# Supplementary material
Source: HighWire-hosted journal article supplement (doi:10.1101/rna.080839.125)
Supplement: SupplementalTableS1.xlsx [file SupplementalTableS1.xlsx]

## Sheet: CDS reliable sRNA-target
Table S1: Data of sRNA-target interactions included in the study
sRNA	Target	Log libraries_(out of 6)	Stationary libraries (out of 3)	Iron libraries (out_of_3)	EPEC	Klebsiella	Salmonella	Prime positions in motif	Motif sequence	Length of binding site	Start motif_position	Location of prime positions in regard to the reading frame	Effect of sRNA on target expression	Bruguierivoracaceae (6)	Budviciaceae (6)	Enterobacteriaceae (1118)	Erwiniaceae (149)	Hafniaceae (37)	Morganellaceae (238)	Pectobacteriaceae (124)	Yersiniaceae (349)
ArcZ	aegA	6	2	2	1	1	1	['6', '8']	TCAATCAGCAAAA	13	2585281	['N1', 'N3']		0	0	1072	1	0	0	0	0
ArcZ	aspA	6	3	3	1	1	1	['6', '8']	GGTACCAGGGAAG	13	4368291	['N3', 'N2']		0	0	1069	35	0	20	0	220
ArcZ	bamE	4	3	3	1	1	0	['6', '8']	TCAACCAGGGGAA	13	2753699	['N1', 'N3']		0	0	1069	35	0	12	0	221
ArcZ	clpP			U	0	1	0	['6', '8']	GCTACCAGGGCCA	13	457098	['N1', 'N3']		0	0	1070	35	0	20	0	221
ArcZ	clpS	U	3	1	1	0	0	['6', '8']	ACTACCAGGGGAA	13	923109	['N1', 'N3']		0	0	1069	35	0	20	0	221
ArcZ	crp	4	3	3	1	1	1	['6', '8']	TTCACCAGGGTGA	13	3486211	['N1', 'N3']		0	0	1070	35	0	20	0	221
ArcZ	cspD	U	3	2	1	1	1	['6', '8']	TCCACCAGGGGCC	13	922436	['N1', 'N3']		0	0	1069	35	0	5	0	221
ArcZ	cstA	1	3	2	1	1	1	['6', '8']	CAAATCAGGGAAA	13	629899	['N2', 'N1']		0	0	1070	8	0	0	0	2
ArcZ	dctR		3		1	0	0	['6', '8']	ATTACCAGGGATA	13	3654695	['N3', 'N2']		0	0	416	0	0	0	0	0
ArcZ	diaA		U	U	0	1	1	['6', '8']	CTCACCAGGATGA	13	3296383	['N1', 'N3']		0	0	1070	35	0	20	0	221
ArcZ	emrA			1	1	0	0	['6', '8']	CGTGGCAGGGAAT	13	2811594	['N2', 'N1']		0	0	1067	35	0	11	0	221
ArcZ	fiu			3	1	1	1	['6', '8']	AACACCAGCGAGA	13	839833	['N3', 'N2']		0	0	615	6	0	0	0	3
ArcZ	fliF	1	2	3	1	1	1	['6', '8']	TTCGCCAGTGGAT	13	2014856	['N1', 'N3']		0	0	862	26	0	0	0	32
ArcZ	flxA	5	1	3	1	1	1	['6', '8']	CAATTCAGGGAAA	13	1646415	['N1', 'N3']		0	0	108	0	0	0	0	1
ArcZ	folA		U	2	0	1	0	['6', '8']	CATACCTGGGAAT	13	49955	['N3', 'N2']		0	0	1068	35	0	20	0	221
ArcZ	gcvT	1	3	3	1	0	0	['6', '8']	CGCACCCGGGAGT	13	3050487	['N3', 'N2']		0	0	1070	35	0	20	0	221
ArcZ	glpK	1	3	3	1	0	1	['6', '8']	ATTGTCTGGGAAA	13	4116961	['N3', 'N2']		0	0	1069	35	0	20	0	221
ArcZ	glpT	5	3	3	0	0	1	['6', '8']	GGTTCCAGGGGAT	13	2351980	['N1', 'N3']		0	0	1066	34	0	20	0	218
ArcZ	gltP	U	1	2	1	0	0	['6', '8']	TTCTCCTGGGAAG	13	4294539	['N1', 'N3']		0	0	1064	33	0	0	0	186
ArcZ	gnsB		3	3	1	1	1	['6', '8']	AAGACCGGGAAAG	13	1637701	['N3', 'N2']		0	0	425	0	0	0	0	0
ArcZ	gpmA		2	1	1	0	0	['6', '8']	CAAACCAGGGTAA	13	786865	['N1', 'N3']	up	0	0	1070	35	0	20	0	221
ArcZ	gpsA	4	3	3	1	0	1	['6', '8']	AACCCCAGGGAAC	13	3782643	['N1', 'N3']		0	0	1070	0	0	0	0	0
ArcZ	gyrA		2		1	1	0	['6', '8']	CTCACCAGGGCTA	13	2337790	['N1', 'N3']		0	0	1070	35	0	20	0	221
ArcZ	hemX		1	1	0	1	0	['6', '8']	GCCACCAGCGATG	13	3988868	['N3', 'N2']		0	0	1069	0	0	0	0	1
ArcZ	hrpA		2		0	1	0	['6', '8']	GTCGCCGGGGAAA	13	1483352	['N3', 'N2']		0	0	1069	35	0	20	0	221
ArcZ	hypE	4	3	3	1	1	1	['6', '8']	TCCACTGGGGAAA	13	2854135	['N2', 'N1']		0	0	1070	1	0	10	0	45
ArcZ	ibpA	U	2	1	1	0	0	['6', '8']	TGTACCAGGGCAT	13	3867166	['N1', 'N3']		0	0	1070	33	0	0	0	219
ArcZ	kdsC	1	2	2	1	0	0	['6', '8']	ATTACCGGGCGAA	13	3342495	['N3', 'N2']		0	0	1070	35	0	20	0	221
ArcZ	ligA	1	3	3	1	0	0	['6', '8']	ACCACCGGGGAAG	13	2529759	['N3', 'N2']		0	0	1070	35	0	20	0	221
ArcZ	lptB	1	2	3	1	1	1	['6', '8']	AACTCCGGGGAAA	13	3344022	['N3', 'N2']		0	0	1070	35	0	20	0	221
ArcZ	lptF	U	2	2	1	0	0	['6', '8']	TCAACCAGGGAAC	13	4486837	['N1', 'N3']	down	0	0	1069	35	0	20	0	221
ArcZ	lpxC		3	2	1	0	0	['6', '8']	AACACCGGGGTCA	13	106656	['N3', 'N2']		0	0	1068	35	0	20	0	221
ArcZ	malG	5	3	3	1	1	1	['6', '8']	TGCGTCAGGGAAA	13	4243401	['N1', 'N3']		0	0	1068	31	0	0	0	218
ArcZ	metN		U	2	1	0	0	['6', '8']	TCCACCAGGGCAC	13	222614	['N1', 'N3']		0	0	1069	35	0	20	0	221
ArcZ	mglA		1	1	0	1	1	['6', '8']	TCCTCCGGGGAAT	13	2239268	['N3', 'N2']		0	0	1067	0	0	0	0	1
ArcZ	mglC		1	U	0	0	1	['6', '8']	TCACCCAGGGGAC	13	2237563	['N1', 'N3']		0	0	1066	35	0	0	0	206
ArcZ	napF	6	3	3	1	0	1	['6', '8']	CACACCAGGGCCT	13	2303236	['N3', 'N2']		0	0	796	0	0	13	0	0
ArcZ	nrdE		U	3	1	0	0	['6', '8']	TCTTCCAGCGACT	13	2802396	['N1', 'N3']		0	0	1069	35	0	20	0	219
ArcZ	nudF		1	U	1	0	0	['6', '8']	GACACCAGCGAAA	13	3177661	['N3', 'N2']		0	0	1070	35	0	5	0	221
ArcZ	nuoM	U	3	2	0	1	1	['6', '8']	ATCACCATGGGAT	13	2392942	['N3', 'N2']		0	0	1069	35	0	20	0	221
ArcZ	ompA		2		0	0	1	['6', '8']	ACAACCAGGGTCT	13	1019248	['N1', 'N3']		0	0	1070	35	0	20	0	221
ArcZ	ompC	1	3	3	0	1	1	['6', '8']	AGTACCAGGGTAA	13	2312244	['N1', 'N3']		0	0	1078	36	0	14	0	219
ArcZ	ompF	6	2	3	0	1	1	['6', '8']	ACTTCCAGGGTAA	13	986726	['N1', 'N3']		0	0	883	35	0	1	0	220
ArcZ	ompT	U	2	3	1	1	1	['6', '8']	ATGACCCGGGAAA	13	584936	['N1', 'N3']		0	0	297	0	0	0	0	0
ArcZ	oppA	U	3	3	1	1	1	['6', '8']	GTCACCAGGGTAC	13	1302470	['N1', 'N3']	up	0	0	1070	35	0	20	0	220
ArcZ	osmY		1		0	0	1	['6', '8']	ACCACCAGTGAAA	13	4611807	['N3', 'N2']		0	0	1066	35	0	0	0	204
ArcZ	pepP		U		0	1	0	['6', '8']	GCCGTCAGGCCCT	13	3054806	['N1', 'N3']		0	0	1070	32	0	1	0	221
ArcZ	pgi	1	3	3	1	1	1	['6', '8']	TCCACCAGGGAAC	13	4234932	['N1', 'N3']		0	0	1069	35	0	20	0	221
ArcZ	plsB		1	U	0	1	0	['6', '8']	TTTACCAGGGCAT	13	4255634	['N1', 'N3']		0	0	1069	35	0	20	0	221
ArcZ	preT		3		1	0	0	['6', '8']	CAAACCAGGGTTA	13	2234463	['N1', 'N3']		0	0	791	0	0	0	0	0
ArcZ	prlC		3	1	1	0	0	['6', '8']	TACACCTGGGAAA	13	3645044	['N3', 'N2']	up	0	0	1070	35	0	6	0	220
ArcZ	pykA		1	U	0	0	1	['6', '8']	CCAACCTGGGTAA	13	1937941	['N1', 'N3']		0	0	1070	35	0	20	0	221
ArcZ	rbsD	6	3	3	1	1	0	['6', '8']	AACACCAGGGAAA	13	3933628	['N1', 'N3']	up	0	0	1067	35	0	1	0	220
ArcZ	rcnB	U	2	3	1	1	1	['6', '8']	CAAACCAGGGGAC	13	2187106	['N2', 'N1']		0	0	1061	0	0	0	0	0
ArcZ	rhlB		1		0	1	0	['6', '8']	GCCACCTGGCAGC	13	3964810	['N1', 'N3']		0	0	1069	35	0	20	0	221
ArcZ	rlmI	2	3	3	1	0	0	['6', '8']	ATCATCAGGGAAA	13	1029839	['N1', 'N3']		0	0	1070	35	0	0	0	220
ArcZ	rpoB		U		1	0	0	['6', '8']	TCACCCAGGGCGA	13	4184351	['N1', 'N3']		0	0	1067	35	0	20	0	220
ArcZ	rsgA	U	1	3	1	1	1	['6', '8']	ATCACCAGCGTCG	13	4391460	['N1', 'N3']		0	0	1069	35	0	13	0	221
ArcZ	rsmA		1	1	1	0	0	['6', '8']	TCCACCAGGGCCA	13	52417	['N1', 'N3']		0	0	1068	35	0	20	0	221
ArcZ	secB		2	2	0	1	0	['6', '8']	TATACCAAGGATA	13	3784080	['N3', 'N2']		0	0	1070	35	0	20	0	221
ArcZ	secD	1	2	3	1	0	0	['6', '8']	AACTCCAGGAACA	13	428080	['N1', 'N3']		0	0	1070	35	0	20	0	221
ArcZ	sfsA	U	2	3	1	1	1	['6', '8']	CACACCTGGGAAT	13	161294	['N3', 'N2']		0	0	1068	35	0	7	0	221
ArcZ	sthA		U		1	0	0	['6', '8']	TCCATCGGGAAAC	13	4159592	['N1', 'N3']		0	0	1069	35	0	20	0	221
ArcZ	sucD	U	3	3	1	0	1	['6', '8']	TCTGCCAGGGCTT	13	764214	['N1', 'N3']		0	0	1070	35	0	20	0	221
ArcZ	tar	6	3	3	1	1	1	['6', '8']	AGCGCCAGGAAAA	13	1972418	['N3', 'N2']		0	0	870	0	0	0	0	0
ArcZ	tdcE	3		1	1	1	1	['6', '8']	ATAACCAGGGCGT	13	3261973	['N1', 'N3']		0	0	1072	35	0	20	0	219
ArcZ	uspA	1	2	3	1	0	0	['6', '8']	ACCACCAGGACTT	13	3640442	['N1', 'N3']		0	0	1070	35	0	20	0	221
ArcZ	uup	U	2	2	1	1	1	['6', '8']	TCCGCCAGGGGAT	13	1010772	['N1', 'N3']		0	0	1070	35	0	20	0	221
ArcZ	valS	U	U	1	0	1	0	['6', '8']	AAAGCCAGGAAAG	13	4483749	['N1', 'N3']		0	0	1069	35	0	20	0	221
ArcZ	yaeP	2	2	3	1	0	0	['6', '8']	GCTGTCAGGGAAA	13	213990	['N3', 'N2']		0	0	1068	33	0	0	0	37
ArcZ	yagE	3	3	3	1	1	1	['6', '8']	AACGCCCGGGAAA	13	282533	['N3', 'N2']	up	0	0	106	0	0	0	0	1
ArcZ	ybeD		1		1	0	0	['6', '8']	TGCGCCAGGTGAC	13	662529	['N2', 'N1']		0	0	1069	35	0	20	0	221
ArcZ	ycaC		3		1	1	1	['6', '8']	AACGCCTGGGATA	13	945293	['N3', 'N2']		0	0	466	0	0	15	0	176
ArcZ	ycbJ	U	1	1	1	0	0	['6', '8']	ACAGCCAGGGAAA	13	971855	['N1', 'N3']		0	0	1070	0	0	0	0	1
ArcZ	yciT		2	3	1	0	0	['6', '8']	TTGACCAGGGTCA	13	1344309	['N1', 'N3']	down	0	0	1069	1	0	0	0	172
ArcZ	ydcI		2	U	1	0	0	['6', '8']	AAAACCGGGGAAA	13	1494633	['N3', 'N2']		0	0	1023	34	0	0	0	0
ArcZ	yddB			3	1	1	1	['6', '8']	TACACCAGTGAAA	13	1577475	['N3', 'N2']		0	0	368	0	0	0	0	0
ArcZ	yeaC		3		1	1	1	['6', '8']	TATACCAGCGTTT	13	1861934	['N1', 'N3']		0	0	1070	21	0	20	0	177
ArcZ	yegT	U	U	1	1	0	0	['6', '8']	GACACAAGGGGAA	13	2180077	['N2', 'N1']		0	0	860	0	0	0	0	9
ArcZ	yfaY		3	3	1	0	0	['6', '8']	TTCATCAGGGGTT	13	2363542	['N1', 'N3']	down	0	0	1069	35	0	7	0	220
ArcZ	yfbV		2		1	0	0	['6', '8']	TTCGCCGGGGACA	13	2413089	['N1', 'N3']		0	0	1070	27	0	0	0	1
ArcZ	yfgD		1		1	0	0	['6', '8']	TGATTCAGGCAAT	13	2617825	['N1', 'N3']		0	0	1071	24	0	3	0	203
ArcZ	ygiM	U	3	2	1	0	0	['6', '8']	AACACCTGGAATC	13	3201546	['N3', 'N2']		0	0	1070	35	0	0	0	221
ArcZ	yjfY		2		1	0	0	['6', '8']	AGCACCAGGTATA	13	4424517	['N1', 'N3']		0	0	1056	0	0	0	0	0
ArcZ	yjgA		2	3	0	1	0	['6', '8']	TTGATCTGGGGAA	13	4457726	['N1', 'N3']		0	0	1069	35	0	20	0	221
ArcZ	yphC		2		1	0	0	['6', '8']	TTTACCAGGAAAT	13	2675738	['N2', 'N1']		0	0	418	0	0	0	0	12
ArcZ	yqeC	6	2	2	1	0	0	['6', '8']	CGAACCAGGGAAA	13	3014780	['N1', 'N3']		0	0	410	0	0	0	0	0
ChiX	chiP	6	3	3	1	1	1	['3', '7', '8']	AAGATGTT	8	708497	['N1', 'N2', 'N3']		0	0	1090	10	41	95	0	322
ChiX	nadE			1	1	0	0	['3', '7', '8']	AGGAAATT	8	1822519	['N1', 'N2', 'N3']		0	0	1092	17	0	0	0	1
ChiX	yfeH			3	1	1	1	['3', '7', '8']	GGGGATTT	8	2527362	['N2', 'N3', 'N1']		0	0	1092	16	41	22	0	346
CpxQ	alaE		2		1	0	0	['6', '7']	GATTATGGCGGCGGT	15	2799490	['N2', 'N3']		1	0	1095	2	9	0	28	307
CpxQ	alaS	U	1		0	1	0	['6', '7']	CGTGCTGGCAACGGT	15	2819606	['N2', 'N3']		5	6	1098	55	40	203	123	332
CpxQ	ampH		3	1	1	0	0	['6', '7']	CACGCTGGCGGCAAT	15	395556	['N2', 'N3']		0	0	1093	44	42	62	0	307
CpxQ	araJ	U	3	1	1	0	0	['6', '7']	GTTTCTGGTGGCGTT	15	412266	['N2', 'N3']		0	0	1063	1	0	0	0	0
CpxQ	bamA		1		0	1	0	['6', '7']	GGTTATGGTGATGGT	15	199833	['N3', 'N1']		6	6	1096	51	39	195	123	341
CpxQ	clpS		1		0	1	0	['6', '7']	GGCGATGGTGAACAA	15	923167	['N2', 'N3']		6	6	1097	66	41	214	125	303
CpxQ	ddlA	U	2		0	1	0	['6', '7']	GTTTTTGGTGGTAAA	15	400899	['N3', 'N1']		2	0	1096	12	31	140	51	264
CpxQ	emrA	2	3	1	1	0	0	['6', '7']	GTGTCTGGCAGCGTG	15	2811628	['N3', 'N1']		0	6	1095	41	41	113	124	280
CpxQ	fes			3	1	1	1	['6', '7']	TTTTCTGGCGTCAGG	15	613833	['N1', 'N2']		0	0	1089	1	0	0	0	0
CpxQ	flgE	3		2	1	1	1	['6', '7']	TGCGATGGCGAATAA	15	1133290	['N2', 'N3']		0	0	864	0	0	0	4	15
CpxQ	gatB	2	3	3	1	1	1	['6', '7']	TACGATGGCGGCGGA	15	2174519	['N2', 'N3']		0	0	850	4	0	0	0	13
CpxQ	glpK	5	3	3	1	1	1	['6', '7']	AGGGATGGCGAAGAA	15	4116446	['N2', 'N3']		2	6	1098	40	40	220	125	294
CpxQ	glpT	U	3	1	1	1	1	['6', '7']	CATTCTGGCGGTTAT	15	2351103	['N2', 'N3']		1	5	1092	43	37	213	121	260
CpxQ	htpX	U	3	1	1	1	1	['6', '7']	TCTGTTGGCGGGGAA	15	1912396	['N3', 'N1']		5	6	1098	48	40	208	124	354
CpxQ	hupA		1	U	1	0	0	['6', '7']	GTTTCTGGCAAGGCA	15	4200518	['N3', 'N1']		6	6	1099	54	42	226	123	310
CpxQ	hupB	6	3	3	1	0	0	['6', '7']	CGTACTGGCCGCAAC	15	461622	['N3', 'N1']		6	6	1172	62	39	210	123	316
CpxQ	ivy		3		1	1	1	['6', '7']	TGCAATGGCGCAGGA	15	240417	['N2', 'N3']		0	0	588	1	0	0	0	0
CpxQ	kgtP	5	3	3	1	1	1	['6', '7']	TCTGTTGGCGGAGAA	15	2725338	['N3', 'N1']		0	0	1095	41	10	0	121	204
CpxQ	lpp	2	3	2	1	1	0	['6', '7']	TCTGCTGGCAGGTTG	15	1757468	['N2', 'N3']		5	0	1098	54	38	123	125	361
CpxQ	mscL		U		0	1	0	['6', '7']	GGATTTGGCGGTGGG	15	3438074	['N2', 'N3']		1	6	1097	35	39	192	124	278
CpxQ	nadR		1		0	1	0	['6', '7']	GTTTATGGCTGAAAA	15	4627803	['N2', 'N3']		5	0	1095	46	9	216	124	360
CpxQ	ompF	3	1	2	0	1	0	['6', '7']	TATTCTGGCAGTGAT	15	986968	['N2', 'N3']		6	5	899	53	41	72	93	308
CpxQ	oppA		3	U	1	0	0	['6', '7']	CACACTGGCGGAAAA	15	1301280	['N2', 'N3']		5	0	1098	44	42	220	125	287
CpxQ	panD		U		0	1	0	['6', '7']	GATGCTGCAGGGCAA	15	146683	['N2', 'N3']		3	0	1096	57	41	158	123	306
CpxQ	proP		3		0	1	0	['6', '7']	ATTGATGACGGTAAA	15	4330553	['N3', 'N1']		3	0	1091	41	10	191	74	244
CpxQ	rfbC	U	3	U	1	1	1	['6', '7']	GTTGCTGTTGATATT	15	2109889	['N3', 'N1']		1	1	502	2	5	14	16	19
CpxQ	rmf		3		1	1	1	['6', '7']	GAGGCTGGCGAGAAG	15	1015839	['N1', 'N2']		5	0	1098	49	40	155	123	351
CpxQ	secM	1	3	U	1	1	1	['6', '7']	CGCGCTGGCGACAGT	15	107721	['N1', 'N2']		0	0	1094	9	0	0	0	0
CpxQ	shiA		3		1	1	1	['6', '7']	TTTGCTGGTGACACT	15	2054020	['N2', 'N3']		0	0	722	6	0	0	73	14
CpxQ	tehA	U	3	1	1	0	0	['6', '7']	CGTGCTGGCGGAAGT	15	1500779	['N2', 'N3']		1	0	1077	3	4	18	19	3
CpxQ	tolB		2		0	1	0	['6', '7']	ATTTATGGTAATGGT	15	778771	['N2', 'N3']		2	6	1098	56	39	220	125	366
CpxQ	truA	5	3	3	0	1	0	['6', '7']	GTTGCTGGCGGCAAA	15	2434959	['N2', 'N3']		3	6	1098	26	40	226	123	315
CpxQ	uspA	5	3	3	1	0	0	['6', '7']	AGTTCTGGTAGAGAA	15	3640161	['N2', 'N3']		2	6	1098	42	41	221	124	217
CpxQ	uspE		U		1	0	0	['6', '7']	TTTGCTGGCAATGAA	15	1397948	['N2', 'N3']		2	6	1094	52	38	201	125	296
CpxQ	waaS		2	U	1	0	0	['6', '7']	ACTGTTGGCGAAGAT	15	3804819	['N3', 'N1']		0	0	92	0	0	0	0	0
CpxQ	ybgE	1	3	1	1	1	1	['6', '7']	TGTGCTGGTGTGATT	15	774483	['N3', 'N1']		0	0	1097	15	39	2	91	177
CpxQ	yfdY		3		1	0	0	['6', '7']	CTTTATGGTGGGGTA	15	2495077	['N2', 'N3']		0	0	796	0	0	0	0	0
CpxQ	yfhM		3		1	1	1	['6', '7']	GGCGCTGGCAGGGTG	15	2652249	['N2', 'N3']		0	6	1096	15	9	46	0	65
CpxQ	yhaV		3		1	1	1	['6', '7']	GTTATTGGCGGTAGT	15	3277477	['N2', 'N3']		0	0	391	0	0	0	0	0
CpxQ	yhcO		3		1	1	1	['6', '7']	TGGTCTGGCGAAAGA	15	3386055	['N2', 'N3']		0	0	1087	15	0	0	0	23
CpxQ	yifK		U	U	0	1	0	['6', '7']	GGCAATGGCGAAAGT	15	3981849	['N2', 'N3']		2	0	1097	8	19	77	113	297
CpxQ	ypfJ		3		1	1	1	['6', '7']	TGCGTTGGCAAGGGC	15	2596736	['N1', 'N2']		4	6	1099	53	10	58	0	298
CpxQ	yqeB	U	3	U	1	0	0	['6', '7']	CGATCTGGTGAAAGA	15	3012884	['N2', 'N3']		0	0	429	0	38	46	0	11
CpxQ	ytfP		U		1	0	0	['6', '7']	CACGCTGGCCGAACT	15	4448076	['N2', 'N3']		2	6	1097	61	32	66	50	273
CyaR	adhE	U	2	1	1	1	1	['11']	GGGTGGTATCGGTGA	15	1296916	['N1']		1	6	1097	1	26	0	123	214
CyaR	alsE		2	3	1	1	1	['11']	TCCCGGCTTTGCCGG	15	4308065	['N1']		1	0	323	0	0	0	21	153
CyaR	ampE	6	3	3	1	0	0	['11']	CCGCTGTTCTGGCTG	15	119719	['N2']		1	0	1096	1	22	0	123	219
CyaR	amtB	U			1	0	0	['11']	TGCTGACGCAGGTGA	15	473162	['N3']		1	6	1097	1	24	0	124	206
CyaR	ansB	5	3	U	1	1	1	['11']	TGCCGGTGGTGGTGA	15	3100624	['N1']	up	0	6	804	0	24	0	0	200
CyaR	aqpZ			U	1	0	0	['11']	TGGTGGCTGTGGTAG	15	915997	['N1']		0	6	742	0	15	0	0	212
CyaR	atpI	2	3	3	0	1	1	['11']	TGGTGTTACTGGTGG	15	3922181	['N3']		1	0	1098	1	0	0	124	70
CyaR	cbpM		2		1	0	0	['11']	CGGTGGCGCTGACGT	15	1062644	['N3']		0	0	1017	0	0	0	0	43
CyaR	clpB		U		0	0	1	['11']	ACCCGGTACTGATTG	15	2733572	['N3']		1	6	1098	1	25	0	122	212
CyaR	clpS	5	3	3	1	1	0	['11']	AAGTGGCGATGGTGA	15	923163	['N3']		1	6	1097	1	25	0	124	210
CyaR	crcB		3	1	1	1	1	['11']	CGGTGGTACGGGAAG	15	657906	['N1']		0	0	1093	0	0	0	68	187
CyaR	cstA	4	3	3	1	1	1	['11']	TGGTGGTTCTGGCAC	15	631860	['N3']		1	6	1098	0	20	0	116	192
CyaR	cydB	6	3	2	1	0	1	['11']	CGGTGGTTCTGGTAC	15	774072	['N3']		1	6	1098	1	24	0	123	215
CyaR	cyoB	U	2	3	0	1	1	['11']	TGGTGGTTCCGCTGC	15	450268	['N3']		1	6	1097	1	0	0	123	196
CyaR	dctA		1	1	0	0	1	['11']	TGGTGCAACTGGGGC	15	3682801	['N3']		0	6	1098	1	22	0	122	204
CyaR	dcuA	U	3	1	0	0	1	['11']	TGCCGCTATTGGCGT	15	4366669	['N1']		0	3	1095	1	26	0	104	207
CyaR	dcuC	6	U	2	1	1	1	['11']	TTCCGCCACTGGTGT	15	655894	['N1']	up	0	2	1095	1	25	0	70	191
CyaR	dpiB		U	1	1	0	0	['11']	TTCTGATGTTGCTGT	15	652812	['N3']		0	2	793	0	23	0	0	0
CyaR	dtpB	1	2	1	1	0	0	['11']	TGCTGTTGATGGTGC	15	3642276	['N3']	up	0	0	1029	0	26	0	0	32
CyaR	dusC		U		0	1	0	['11']	GGCCGGAGGTGGTTG	15	2229649	['N3']		1	5	1098	1	26	0	121	211
CyaR	ecnB		3		1	1	1	['11']	TTCTGGCGCAGCAAC	15	4376669	['N1']		0	0	1080	0	0	0	0	10
CyaR	eda		U		1	1	1	['11']	GGCTGGTTCCGGCAG	15	1932203	['N3']		1	6	1098	1	24	0	122	213
CyaR	fabG	4	3	3	1	1	1	['11']	TCCTGGCGCAGGTTC	15	1151268	['N3']		1	6	1097	1	24	0	122	214
CyaR	fieF	2	3	3	1	1	0	['11']	TCGCGGCGCTGGCGC	15	4106710	['N3']		0	6	1097	1	23	0	121	150
CyaR	flgG	2		3	1	1	1	['11']	AGCTGGTGACGGCTG	15	1135108	['N3']		1	0	889	1	25	0	124	208
CyaR	fliC	U	1	2	0	0	1	['11']	CACTGATACTGGCGG	15	2002977	['N1']		0	0	52	0	0	0	0	0
CyaR	ftsE		1		0	1	0	['11']	CCGCGGTACTGCTGG	15	3602281	['N3']		1	6	1098	1	24	0	121	195
CyaR	ftsK	3	2	2	0	1	0	['11']	AGGTGGTGCGGGTGG	15	936982	['N1']		0	0	750	0	0	0	0	0
CyaR	ftsY	3	2	2	1	1	1	['11']	AGGCGGTGATGGTGG	15	3603747	['N3']		1	6	1098	1	20	0	123	196
CyaR	ftsZ	U		1	0	1	0	['11']	TGGTGGTACCGGTAC	15	105619	['N1']		1	6	1096	1	23	0	123	197
CyaR	gapA	5	3	3	1	1	0	['11']	AGCTGCTGCTGAAGG	15	1863553	['N1']		1	6	1098	1	23	0	120	215
CyaR	glf	3	3	3	1	1	1	['11']	TGTTGGTTCTGGTTT	15	2108312	['N1']		0	0	77	0	0	0	2	0
CyaR	glpD	6	3	3	1	1	1	['11']	TGCTGATGCTGGAGG	15	3562098	['N3']		1	6	1098	1	24	0	123	201
CyaR	glpT	U	2	3	0	0	1	['11']	TTCCGCCGCTGCTGT	15	2351863	['N3']		1	5	1093	1	23	0	120	209
CyaR	gltX	U	3	1	0	1	0	['11']	CGCTGGAAGTGGTTC	15	2519513	['N3']		1	6	1098	1	24	0	120	202
CyaR	gntU	6	3	3	1	1	0	['11']	TCCTGGCGGTGGTTG	15	3576871	['N3']		1	0	1095	0	25	0	1	122
CyaR	gpmA		2	3	0	0	1	['11']	AGCTGGTTCTGGTTC	15	787582	['N3']		1	6	1098	1	22	0	124	141
CyaR	hdeD		3		1	1	1	['11']	ATCTGGAGATGCTTA	15	3657032	['N3']		0	0	418	0	0	0	0	0
CyaR	helD	1	2	2	1	0	0	['11']	TGTTGGTGATGACTG	15	1025862	['N1']		1	2	1098	1	0	0	121	192
CyaR	hflX	5	3	3	1	1	0	['11']	AGGCGGTACTGGTAC	15	4400700	['N3']		1	6	1097	1	24	0	123	144
CyaR	kgtP	U	3	2	1	1	1	['11']	TGGCGTTTCTGGTTT	15	2724503	['N3']		0	0	1096	1	0	0	120	183
CyaR	lysP		1	U	1	1	0	['11']	GGCTGGATCTGGAGT	15	2248145	['N2']		1	6	1099	1	25	0	123	206
CyaR	mdh	U	3	2	1	1	1	['11']	CGGCGCTGCTGGCGG	15	3384251	['N1']		1	6	1098	1	21	0	123	213
CyaR	mdtK	U	3	1	0	1	0	['11']	ATCCGGCTCTGGCGG	15	1743815	['N3']		1	6	1098	1	25	0	124	211
CyaR	mraY	U		1	1	0	0	['11']	TGGTGGTGCTGGTAG	15	96306	['N3']		1	6	1096	1	23	0	123	211
CyaR	mscL		2	U	0	1	0	['11']	TGGTGGATTTGGCGG	15	3438070	['N3']	down	1	6	1097	1	23	0	123	200
CyaR	murG	U	1	U	1	0	0	['11']	TGTTGGCGCTGCCGT	15	100140	['N3']		1	6	1096	1	26	0	121	213
CyaR	nanT	4		3	1	1	1	['11']	CTGTGGTTCTGCTTC	15	3371866	['N2']		1	0	873	0	24	0	0	3
CyaR	nhaA	1	3	3	1	1	1	['11']	TGGCGCATCTGCCTG	15	18435	['N3']		1	4	1095	1	26	0	86	208
CyaR	nlpD	U	2	2	1	0	0	['11']	AGCCGGTACAGATGG	15	2868470	['N3']		0	0	1097	0	0	0	1	179
CyaR	nrfD	4	1		1	0	0	['11']	TGGTGGTTCTGGCTT	15	4291256	['N2']		0	4	791	1	8	0	116	8
CyaR	nuoL	U	1	2	0	1	0	['11']	TGGTGGTTCTGGTGC	15	2394667	['N3']		1	6	1097	1	24	0	123	187
CyaR	ompA	1	3	2	0	1	0	['11']	TGGTGCTTTTGGTGG	15	1019880	['N1']		1	6	1098	1	26	0	123	225
CyaR	ompX	6	3	3	1	0	0	['11']	TGCCGGTGTTGGTTA	15	850941	['N1']	down	1	0	1095	1	0	0	119	227
CyaR	opgE	1	1	1	1	0	0	['11']	CCGTGGTACAGCTAC	15	852273	['N2']		0	0	1094	0	13	0	0	13
CyaR	patD		3		1	1	1	['11']	GGTCGATGCTGCTGT	15	1515697	['N1']		1	0	1097	1	0	0	120	185
CyaR	pfkA	U		U	0	1	0	['11']	TGGTGGAAGTGATGG	15	4108048	['N3']		1	6	1097	1	26	0	123	219
CyaR	pgpB	U	3	2	1	1	1	['11']	GGCTGGCGTTGGCAA	15	1339405	['N2']		0	0	1096	1	0	0	72	61
CyaR	pitA	1		3	1	1	1	['11']	CCGTGGTTATGGCGG	15	3637799	['N3']		1	0	1098	1	26	0	123	142
CyaR	ptsG	6	3	3	1	0	0	['11']	TGCTGGTTCTGGTGT	15	1159218	['N1']		1	0	1097	1	23	0	123	211
CyaR	rbsC	6	3	3	1	1	1	['11']	TGGCGGTGCTGGTAG	15	3936222	['N3']		1	6	1089	1	24	0	123	204
CyaR	recA	U	1	1	0	1	0	['11']	GCGTGGTACAGCTAC	15	2822902	['N2']		1	6	1090	1	23	0	123	141
CyaR	rfbA	6	3	3	1	1	1	['11']	GGGTGGTTCTGGTAC	15	2110990	['N1']		1	6	1090	1	4	0	123	220
CyaR	rhtA	U	2	1	1	0	0	['11']	CGGTGGCGCTGGAGT	15	849799	['N3']	down	0	3	1095	1	0	0	103	218
CyaR	rimP		1	1	1	1	0	['11']	TGATTGTGCTGATGT	15	3317860	['N1']		1	6	1098	1	24	0	124	211
CyaR	rppH	U	3	2	0	1	0	['11']	TCTTGCAGCTGGTGA	15	2968676	['N3']		1	6	1098	1	23	0	123	142
CyaR	rpsK	4	2	3	0	1	0	['11']	CGGTGGTTCCGGTTT	15	3441958	['N1']		1	6	1098	1	25	0	124	226
CyaR	rpsT	6	3	3	1	1	0	['11']	TGGCGACAAAGCTGC	15	20956	['N1']	down	1	6	1096	1	26	0	123	220
CyaR	sbmA		2	3	1	1	1	['11']	AGCCGGTGGGGGTGA	15	396722	['N1']		0	0	1099	0	0	0	50	3
CyaR	slyB	6	3	3	1	0	0	['11']	CGCTGTTGCAGGTGG	15	1720148	['N1']		1	0	1097	1	23	0	122	32
CyaR	smpB	2	3	2	1	1	1	['11']	TCCCTGTACTGGAAA	15	2755238	['N2']		1	6	1098	1	24	0	123	213
CyaR	tamA		U	U	0	1	1	['11']	AAGCGGATCTGCCGT	15	4442426	['N1']		1	6	1097	1	24	0	124	209
CyaR	tcdA	4	3	3	1	1	1	['11']	CGGTGGCGCGGGTGG	15	2945387	['N1']		1	6	1098	1	24	0	124	209
CyaR	tdcA			1	1	0	0	['11']	TAGTGGTGCGGAAAA	15	3266908	['N3']	up	0	0	1056	0	26	0	0	0
CyaR	trkG	1	3	1	1	1	1	['11']	AGGTGGTTTAGGAGT	15	1424201	['N1']		0	0	183	0	0	0	2	14
CyaR	ubiC	1	3	3	1	1	1	['11']	TGCCGCTGCTGCCGA	15	4252699	['N3']		0	0	1096	0	0	0	15	3
CyaR	uspB	U	1		1	0	0	['11']	ATATGTTGATGGAGG	15	3639595	['N1']		1	0	1098	1	26	0	124	210
CyaR	uspE	6	3	3	1	0	0	['11']	CGCTGGTGGCGGTGA	15	1398156	['N3']		1	6	1094	1	24	0	124	202
CyaR	wbbH	1	3	3	1	1	1	['11']	TCGCGTTTCAGGAGT	15	2106472	['N3']		0	0	55	0	0	0	0	0
CyaR	yacL	3	3	3	1	1	1	['11']	CGCTGGCGATGAAAT	15	134630	['N1']		1	6	1096	1	26	0	123	210
CyaR	yajC		2		0	1	0	['11']	TTTTGATGCTGGTGG	15	427357	['N3']		1	6	1098	1	25	0	123	209
CyaR	ybaL		U		0	1	0	['11']	TGCTGGAACTGCTGG	15	501611	['N3']		1	6	1097	1	0	0	121	203
CyaR	ybeD			1	0	1	0	['11']	TGGTTGATCAGGTGG	15	662563	['N3']		1	6	1097	1	24	0	124	219
CyaR	ybfA		2		0	0	1	['11']	TTCTGGCGCTGCCTT	15	729204	['N3']		0	0	1098	1	0	0	110	201
CyaR	ychJ		3	1	1	1	1	['11']	TTGTGGTTCAGGTAA	15	1288716	['N1']		0	0	1095	0	0	0	0	0
CyaR	ydcH	U	3	2	1	1	1	['11']	TCCTGCAGCAGGAGA	15	1498844	['N3']		0	0	453	0	0	0	1	13
CyaR	yeaQ		3		1	1	1	['11']	TGCCGTAGTCGGCGG	15	1879139	['N1']		1	4	1075	0	20	0	104	227
CyaR	yecH	6	3	3	1	0	0	['11']	TAGCGTTTCTGGCAG	15	1989333	['N3']		0	0	1048	1	3	0	90	0
CyaR	yeiH	6	3	3	1	0	0	['11']	CTGTGACGGTGGTGT	15	2249920	['N1']		1	6	1098	0	24	0	63	210
CyaR	yejO	5	2	3	1	0	0	['11']	TCCTGGCGGAGAACA	15	2288802	['N3']		0	0	331	0	0	0	0	0
CyaR	yfdY	6	3	3	1	0	0	['11']	ACGTGGTATCGGCGG	15	2495222	['N3']		0	0	796	0	0	0	0	0
CyaR	yicL	3	2	3	1	0	0	['11']	GTTTGATTCTGGCGT	15	3838894	['N3']		0	0	1083	0	26	0	0	0
CyaR	yidI	6	3	3	1	1	1	['11']	TTTTGGTATCGGCAT	15	3856786	['N1']		0	0	295	0	0	0	0	0
CyaR	yjdC		3		1	1	1	['11']	CGCTGGAGATGGTTG	15	4363241	['N3']		0	0	1096	1	22	0	121	147
CyaR	yjjU	1	3	2	1	1	1	['11']	CGCCGTTGTCGCTAA	15	4612448	['N3']		0	3	1095	0	24	0	0	201
CyaR	yohD	1	2	U	1	0	0	['11']	TCGTGGTTCTGGTGG	15	2226306	['N3']		0	0	1098	0	0	0	2	201
CyaR	zapB	1	1	2	0	1	1	['11']	CTCTGTTGCAGATGG	15	4118582	['N3']		1	0	1097	1	24	0	122	191
CyaR	znuC		U		1	0	0	['11']	CACTGGTACGGGTAG	15	1942795	['N3']		1	6	1098	1	22	0	124	221
DsrA	guaA		U		1	0	0	['7']	AAATTCGTGAC	11	2632402	['N2']		0	0	1096	0	0	0	0	0
DsrA	hns	4	3	3	1	1	1	['7']	AATATCGCGAA	11	1292744	['N2']		0	0	1141	0	0	0	0	0
DsrA	nlpD				1	0	1	['7']	AAATTCGTTAC	11	2867669	['N2']		0	0	1095	0	0	0	0	0
DsrA	rbsD	4	2	3	1	1	1	['7']	AAATTCGTTAC	11	3933649	['N2']		0	0	1093	0	0	0	0	0
DsrA	rpoS	6	3	3	1	1	1	['7']	AAAAGCGTTGC	11	2866859	['N3']		0	0	1093	0	0	0	0	0
DsrA	yfgM			U	1	0	0	['7']	AAATTTGCTGC	11	2639055	['N1']		0	0	1096	0	0	0	0	0
FliX	fliC	6	2	3	1	1	1	['7']	TGGTGCTACCA	11	2003037	['N3']		0	0	52	0	0	0	0	0
FliX	mglB	4	U	U	1	1	1	['7']	CGCTGCTGATA	11	2240283	['N3']		0	0	774	0	0	0	0	0
FliX	rplC	3		3	1	1	1	['7']	CGGTGCTAAAA	11	3452771	['N3']		0	0	774	0	0	0	0	0
FliX	rpsQ	6		3	1	1	1	['7']	CGGTTCTGTAA	11	3448324	['N2']		0	0	774	0	0	0	0	0
FliX	rpsS	3	1	2	1	1	1	['7']	CGCTGCTGATA	11	3450278	['N3']		0	0	774	0	0	0	0	0
FnrS	iscR	6	3	3	1	0	0		GTTAGGCAAAGATGC	15	2661934			5	0	1099	48	42	18	125	345
GadF	elaB		3		1	1	1	['4', '5']	GCAGGCAG	8	2380830	['N3', 'N1']		0	0	415	0	0	0	0	0
GadF	fabZ		1		1	0	0	['4', '5']	ACTGGTGG	8	202172	['N3', 'N1']		0	0	415	0	0	0	0	1
GadF	lpp		1		1	0	0	['4', '5']	GCTGGCAG	8	1757471	['N3', 'N1']		0	0	415	0	0	0	0	1
GadF	trmJ		3		1	1	1	['4', '5']	GCTGGTGG	8	2663300	['N3', 'N1']		0	0	415	0	0	0	0	1
GadF	wrbA			U	1	1	1	['4', '5']	GCAGGCGG	8	1067213	['N1', 'N2']		0	0	413	0	0	0	0	1
GadF	yebO		U		1	0	0	['4', '5']	GGTGGTGG	8	1908495	['N3', 'N1']		0	0	415	0	0	0	0	0
GadF	yohP			U	1	1	1	['4', '5']	ACTGGTGG	8	2229029	['N3', 'N1']		0	0	410	0	0	0	0	0
GcvB	asnA		U	1	1	0	0		CCAAACAACGTCAA	14	3927174		up	0	0	1096	1	40	221	68	304
GcvB	glpC	5		U	1	1	1		CCAATCGTCAACAC	14	2355848			1	0	1085	1	40	201	120	362
GcvB	icd	5	2	3	1	1	1		GCACAAGGCAAGAA	14	1195147			0	0	1100	51	39	228	120	350
GcvB	ilvM	6	2	3	1	0	0		CCACATCACAACAA	14	3952439		down	1	0	1100	63	25	21	117	346
GcvB	malE			2	0	1	0		AACAAACACATGAA	14	4245741			1	0	1096	29	40	19	0	294
GcvB	nlpA	3		3	1	1	1		GAAACTGACAACAC	14	3839991		down	1	0	1098	43	39	188	122	334
GcvB	oppA	6	3	3	1	0	0		ATGACCAACATCAC	14	1301182		down	1	0	1099	45	42	220	124	287
GcvB	rodZ			U	1	1	0		ACCGCAACCAACAC	14	2642286			0	0	1061	0	0	0	0	1
GcvB	rppH	2		1	1	1	0		GCCAAAAACAAAAA	14	2968697			1	0	1099	49	37	189	123	275
GcvB	rpsT	1		1	0	1	0		GCACAACGCAAGCC	14	21022			1	0	1097	72	42	223	123	362
GcvB	thrL	U	3	3	1	1	1		ACCACCACCATCAC	14	213			1	0	1044	70	0	17	114	3
GcvB	trpE		2		1	0	0		GATATCGACAGCAA	14	1322823			1	0	1098	43	10	60	124	309
GcvB	waaP	U		1	1	0	0		GAACACAACGCAAA	14	3805175			0	2	806	2	9	59	19	0
GcvB	ybhP		3		1	0	0		ATCAAACACAACAA	14	824490			1	0	1084	25	0	0	0	0
GcvB	yhjE	U	U	2	1	0	0		AACAGCCACAACAC	14	3674794			1	0	1099	43	0	0	124	203
GcvB	ysgA	3	3	3	1	0	1		CAACAACACAACAA	14	4016165		down	1	0	1099	51	10	0	120	368
GcvB	zapE	2		2	0	1	0		AAGGCAGCCATCAA	14	3379951			2	0	1099	36	13	75	125	319
MgrR	amn	3	2	3	1	1	1	['1', '3', '4', '5', '6']	GCATGGAA	8	2055820	['N1', 'N3', 'N1', 'N2', 'N3']		0	0	1079	0	0	0	0	0
MgrR	aspA	2	1	1	1	0	1	['1', '3', '4', '5', '6']	GCATGGAT	8	4368062	['N2', 'N1', 'N2', 'N3', 'N1']		0	0	1080	0	0	0	0	0
MgrR	cheA	U		1	0	0	1	['1', '3', '4', '5', '6']	GCATGGAT	8	1975320	['N2', 'N1', 'N2', 'N3', 'N1']		0	0	868	0	0	0	0	0
MgrR	dacC	U	1	2	1	0	0	['1', '3', '4', '5', '6']	GCATGGAT	8	880847	['N1', 'N3', 'N1', 'N2', 'N3']		0	0	1081	0	0	0	0	0
MgrR	dctA	U	2	1	1	0	1	['1', '3', '4', '5', '6']	GCATGGAA	8	3683260	['N2', 'N1', 'N2', 'N3', 'N1']		0	0	1081	0	0	0	0	0
MgrR	gloB	3	1	2	1	0	0	['1', '3', '4', '5', '6']	GCATGGTT	8	234059	['N1', 'N3', 'N1', 'N2', 'N3']		0	0	1081	0	0	0	0	0
MgrR	minD	3	2	3	0	0	1	['1', '3', '4', '5', '6']	GCATGGAA	8	1224778	['N2', 'N1', 'N2', 'N3', 'N1']		0	0	1082	0	0	0	0	0
MgrR	motB	5		1	1	1	1	['1', '3', '4', '5', '6']	GCATGGAG	8	1975930	['N2', 'N1', 'N2', 'N3', 'N1']		0	0	874	0	0	0	0	0
MgrR	napH	6		2	1	1	1	['1', '3', '4', '5', '6']	GTATGGAT	8	2298893	['N2', 'N1', 'N2', 'N3', 'N1']		0	0	795	0	0	0	0	0
MgrR	soxS	1	3	3	1	0	0	['1', '3', '4', '5', '6']	GCATGGAT	8	4277350	['N1', 'N3', 'N1', 'N2', 'N3']		0	0	1076	0	0	0	0	0
MgrR	ycbZ	6	2	3	1	0	0	['1', '3', '4', '5', '6']	GCATGGCG	8	1018281	['N1', 'N3', 'N1', 'N2', 'N3']		0	0	1081	0	0	0	0	0
MgrR	ygdQ	6	3	3	1	1	1	['1', '3', '4', '5', '6']	GCATGGAT	8	2970429	['N1', 'N3', 'N1', 'N2', 'N3']		0	0	1024	0	0	0	0	0
MgrR	ygfZ	2	3	3	1	1	1	['1', '3', '4', '5', '6']	GCATGGAT	8	3041559	['N1', 'N3', 'N1', 'N2', 'N3']		0	0	1081	0	0	0	0	0
MgrR	zapB	U	U	1	1	1	0	['1', '3', '4', '5', '6']	GCATGGAA	8	4118744	['N2', 'N1', 'N2', 'N3', 'N1']		0	0	1080	0	0	0	0	0
MicA	clpB		1		1	0	0	['10']	TAATCTTTGCGACAA	15	2733901	['N3']		2	0	1099	42	36	22	122	349
MicA	cysB		3	2	1	0	0	['10']	ACAACTTCGCTATAT	15	1333866	['N3']	down	6	0	1098	51	42	26	120	282
MicA	hisJ		1		1	0	0	['10']	CGAAATGCGCGCTGA	15	2426078	['N3']		1	0	1098	43	8	0	123	315
MicA	htpX		1		0	0	1	['10']	ACCGGTGCGCGCCGT	15	1912252	['N1']		5	0	1099	49	40	22	123	354
MicA	ldtE		1		1	0	0	['10']	TGAAACGCGCGTCTT	15	1758724	['N2']	down	2	3	1094	10	6	69	57	248
MicA	moaA	2	1	2	1	0	0	['10']	GCATTTGCGCGTAAG	15	817065	['N1']		2	0	1099	27	39	22	123	296
MicA	nmpC	5	3	2	0	0	1	['10']	ACTTATGCCCGTCTT	15	576657	['N1']		3	0	1104	67	40	8	43	351
MicA	ompA	6	3	3	1	0	1	['10']	CCAACTGGGCGCTGG	15	1019892	['N3']	down	3	0	1099	61	41	21	122	322
MicA	ompC		2		1	0	1	['10']	ACCTACATGCGTCTT	15	2312587	['N1']		5	0	1108	44	40	5	0	345
MicA	ompF	6	3	2	1	0	1	['10']	ACCTATGCCCGTCTT	15	986802	['N1']	up	6	0	900	54	41	1	93	308
MicA	pykA		2	1	1	0	0	['10']	CAAAATGCGCGCGGA	15	1937789	['N3']		5	0	1099	41	42	26	123	305
MicA	rbsC	U	3	2	1	0	0	['10']	ACATCTACGCGCTGG	15	3935880	['N2']		1	0	1089	43	39	21	122	252
MicA	sucA		3	1	1	1	1	['10']	GAAAAAACGCTTCTT	15	759302	['N3']		5	0	1099	46	37	29	121	281
MicA	tolB	6	3	3	1	0	1	['10']	TTCAAAGCGCGTCTT	15	778967	['N1']	down	2	0	1099	57	39	24	123	366
OmrB	fabA		U	1	0	1	0	['5']	TGCCTCTGGT	10	1016429	['N1']		2	6	1099	42	37	0	124	336
OmrB	fecA			2	0	1	0	['5']	AACCTCTTCA	10	4515874	['N1']		0	0	320	4	6	0	38	159
OmrB	iscS		U	1	0	1	0	['5']	TACCTCTGGT	10	2661319	['N1']		5	6	1099	26	40	0	123	342
OmrB	rcnB	U	3	1	1	0	0	['5']	TACCTCGGGA	10	2187049	['N1']		0	0	1061	3	0	0	0	0
RaiZ	rhoL				1	0	0	['1', '3', '8']	GGCAGCGA	8	3966307	['N2', 'N1', 'N3']		0	0	1094	0	0	0	0	0
RprA	bax	U	3		1	1	1	['3', '6']	CACAACAAC	9	3737088	['N2', 'N2']		0	0	1096	0	0	0	0	0
RprA	evgA		3		1	0	0	['3', '6']	CGCAGCAAT	9	2483793	['N2', 'N2']		0	0	593	0	0	0	0	12
RprA	fabZ		U	1	1	0	0	['3', '6']	CGCAGTAAA	9	202217	['N2', 'N2']		1	0	1096	38	0	2	2	13
RprA	flhD	U		1	1	0	1	['3', '6']	CACAGCGTT	9	1978136	['N1', 'N1']		1	0	888	50	0	2	2	13
RprA	focA	1	3	2	1	0	0	['3', '6']	CACAGCAAC	9	954308	['N2', 'N2']		1	0	1098	27	0	2	2	12
RprA	fur		U		1	1	1	['3', '6']	CACAGCAAC	9	710399	['N1', 'N1']		1	0	1097	34	0	2	2	13
RprA	gltB			U	1	0	0	['3', '6']	TGCAGCACC	9	3354840	['N1', 'N1']		1	0	1088	6	0	0	2	10
RprA	gltI		U		1	0	0	['3', '6']	CACAGCAAT	9	687727	['N2', 'N2']		1	0	1097	46	0	2	2	12
RprA	katG		1		1	0	0	['3', '6']	TACCGCAAA	9	4134018	['N3', 'N3']		1	0	1098	31	0	0	2	1
RprA	leuS		U		1	0	0	['3', '6']	CACAGCAAA	9	672744	['N2', 'N2']		1	0	1097	47	0	2	2	12
RprA	lpd		U		1	1	1	['3', '6']	CGTAGCAAA	9	128085	['N2', 'N2']		1	0	1096	35	0	2	2	10
RprA	mltD		U		1	0	0	['3', '6']	AGCAGCAAA	9	233848	['N2', 'N2']		1	0	1098	50	0	0	2	13
RprA	nlpD				1	0	1	['3', '6']	GGCAGCAAA	9	2867898	['N3', 'N3']		0	0	1097	31	0	0	0	5
RprA	ompF	2	2	1	1	0	0	['3', '6']	TACAGCGAT	9	986547	['N3', 'N3']		1	0	900	45	0	0	1	12
RprA	pspB		U		1	0	0	['3', '6']	TACAGCAAT	9	1368876	['N3', 'N3']		0	0	1101	25	0	0	1	14
RprA	rcsB	U	3		1	0	0	['3', '6']	TACAGCACT	9	2316290	['N2', 'N2']		1	0	1085	23	0	2	2	15
RprA	rlmE		1		1	0	0	['3', '6']	TACAGCAAA	9	3327540	['N1', 'N1']		1	0	1098	46	0	2	2	14
RprA	rpoE		U		1	0	0	['3', '6']	CATGGCAAT	9	2709584	['N2', 'N2']		1	0	1098	45	0	2	2	13
RprA	yfgM		1		1	0	0	['3', '6']	CGCAGCAAT	9	2639000	['N1', 'N1']		0	0	1098	30	0	0	1	0
RybB	ftsI	1	3	3	1	1	1	['2', '4', '5', '6', '7', '8']	GCAGTGGC	8	92602	['N3', 'N2', 'N3', 'N1', 'N2', 'N3']		5	0	1097	16	39	104	121	323
RydC	yrbL	U	3	1	1	0	0	['1', '2', '4', '5', '6', '7', '8']	ACATCGGA	8	3348493	['N3', 'N1', 'N3', 'N1', 'N2', 'N3', 'N1']		0	0	766	0	0	0	0	0
RyhB	accA			1	0	1	0	['3', '4', '5']	AGCTGGAAGCG	11	208661	['N1', 'N2', 'N3']		5	6	1097	55	37	219	125	349
RyhB	chbB			3	1	1	1	['3', '4', '5']	TACTGGTATCA	11	1821567	['N1', 'N2', 'N3']		0	0	1079	0	8	137	0	311
RyhB	chiP			3	0	1	0	['3', '4', '5']	TACTGGCAGCG	11	708472	['N3', 'N1', 'N2']		0	4	1097	20	41	144	0	325
RyhB	cirA			3	1	0	0	['3', '4', '5']	ATCTGAAGGAT	11	2246573	['N1', 'N2', 'N3']	up	0	3	1022	5	9	0	0	0
RyhB	cysE			2	1	0	0	['3', '4', '5']	CGCTGGCGGAC	11	3782507	['N1', 'N2', 'N3']		2	6	1099	50	41	225	125	368
RyhB	cysJ			U	0	1	0	['3', '4', '5']	TTCTGGAAGTG	11	2890202	['N1', 'N2', 'N3']	up	5	6	1099	45	9	75	123	264
RyhB	dksA			2	1	0	0	['3', '4', '5']	TTCTGGAAGCA	11	160477	['N1', 'N2', 'N3']		5	6	1097	50	40	216	124	281
RyhB	exbB			3	1	1	1	['3', '4', '5']	ATCTGGAAGCC	11	3151311	['N1', 'N2', 'N3']		2	0	1099	45	0	29	122	277
RyhB	fabZ			3	1	1	0	['3', '4', '5']	TTCTGGAAGCA	11	202297	['N1', 'N2', 'N3']		2	6	1097	47	41	214	125	258
RyhB	fdoG			2	0	1	0	['3', '4', '5']	CGCTGGCGGTA	11	4085787	['N2', 'N3', 'N1']	down	0	6	1104	18	41	215	119	330
RyhB	fdx			1	1	1	1	['3', '4', '5']	TTCTGGAAGCT	11	2657031	['N1', 'N2', 'N3']		0	6	1098	11	40	221	121	303
RyhB	flgA			3	1	1	1	['3', '4', '5']	AGCTGGAAGCT	11	1130538	['N1', 'N2', 'N3']		0	0	873	1	0	0	0	0
RyhB	fliA			3	1	1	1	['3', '4', '5']	TGCTGGATGAA	11	2001554	['N1', 'N2', 'N3']		2	0	879	45	37	198	123	347
RyhB	fliF			3	1	1	1	['3', '4', '5']	TTCTGGCAACA	11	2014549	['N3', 'N1', 'N2']		2	0	873	43	7	5	46	117
RyhB	gatZ			3	1	1	1	['3', '4', '5']	TACTGGAAAAA	11	2175349	['N3', 'N1', 'N2']		4	0	858	0	7	84	0	12
RyhB	gcvH			3	1	1	0	['3', '4', '5']	TGCTGGATGCG	11	3049203	['N1', 'N2', 'N3']	down	3	6	1099	58	41	212	124	305
RyhB	gpmM			1	0	1	0	['3', '4', '5']	TTCTGGATGGC	11	3785294	['N1', 'N2', 'N3']		0	6	1098	1	35	0	0	284
RyhB	hns			3	1	1	1	['3', '4', '5']	TGCTGGAAAAA	11	1292837	['N1', 'N2', 'N3']		6	6	1144	26	42	223	124	342
RyhB	hybO	U		2	1	0	0	['3', '4', '5']	GACTGGAGATA	11	3146259	['N2', 'N3', 'N1']		1	4	807	1	35	179	66	48
RyhB	infB			1	0	1	0	['3', '4', '5']	GGCTGAAAAAG	11	3315505	['N2', 'N3', 'N1']		3	6	1099	48	37	194	124	359
RyhB	ispA			3	1	1	0	['3', '4', '5']	CACTGGAAGCG	11	440245	['N1', 'N2', 'N3']		3	6	1099	37	37	228	125	350
RyhB	katG			U	0	1	0	['3', '4', '5']	CACTGGCAAAT	11	4133870	['N2', 'N3', 'N1']	down	1	0	1099	34	31	0	115	194
RyhB	ligB			3	1	1	1	['3', '4', '5']	TACTGGAAGGA	11	3821029	['N3', 'N1', 'N2']		0	0	885	0	0	0	0	0
RyhB	loiP			3	1	1	1	['3', '4', '5']	GACTGGTTGCC	11	3081960	['N2', 'N3', 'N1']	down	0	0	1100	40	9	158	75	335
RyhB	lpp			3	1	1	0	['3', '4', '5']	TGCTGGCAGGT	11	1757470	['N1', 'N2', 'N3']		5	0	1099	55	38	123	125	361
RyhB	metH			2	0	1	0	['3', '4', '5']	TGCTGGACGGC	11	4223880	['N1', 'N2', 'N3']		2	6	1098	27	40	180	122	353
RyhB	motB			3	1	1	1	['3', '4', '5']	AGCTGAAAAAA	11	1975942	['N1', 'N2', 'N3']		5	0	890	55	40	4	120	355
RyhB	mrp			3	1	1	1	['3', '4', '5']	CGCTGGCGGCA	11	2193777	['N1', 'N2', 'N3']	down	5	6	1113	49	41	220	121	347
RyhB	narG			2	0	1	0	['3', '4', '5']	GACTGGGAGGA	11	1279954	['N3', 'N1', 'N2']	down	2	1	1097	21	34	176	118	210
RyhB	nirB			2	0	1	0	['3', '4', '5']	GTCTGGAAGCC	11	3494480	['N1', 'N2', 'N3']		1	0	1099	21	10	134	121	345
RyhB	nuoA			3	0	1	0	['3', '4', '5']	TGCTGGTAGGC	11	2404984	['N1', 'N2', 'N3']		2	6	1098	47	41	208	123	339
RyhB	nuoC			3	1	0	0	['3', '4', '5']	CGCTGGCAGAA	11	2403511	['N1', 'N2', 'N3']		2	6	1098	45	39	189	124	261
RyhB	paaJ			3	1	1	1	['3', '4', '5']	CACTGGCTGCC	11	1461992	['N1', 'N2', 'N3']		0	0	513	0	9	71	0	193
RyhB	proP			3	1	0	0	['3', '4', '5']	CGCTGGCGGCG	11	4331664	['N1', 'N2', 'N3']		3	0	1092	42	10	191	74	244
RyhB	ribF			U	0	1	0	['3', '4', '5']	AGCTGGAAGTG	11	22170	['N1', 'N2', 'N3']		6	6	1097	51	42	216	124	362
RyhB	rplL			2	1	1	0	['3', '4', '5']	CTCTGGAAGAA	11	4180888	['N1', 'N2', 'N3']	up	3	6	1096	38	37	212	122	333
RyhB	rplU			3	1	1	0	['3', '4', '5']	AACTGGCGAAA	11	3333368	['N2', 'N3', 'N1']		6	6	1099	50	42	224	124	356
RyhB	rpsO			3	1	0	0	['3', '4', '5']	TGCTGACTGCA	11	3311593	['N1', 'N2', 'N3']		5	6	1099	65	41	214	124	301
RyhB	rraB			2	1	0	0	['3', '4', '5']	AACTGGAAGAA	11	4478489	['N1', 'N2', 'N3']		5	6	1098	43	38	201	123	343
RyhB	rsmH			1	0	1	0	['3', '4', '5']	CGCTGGAAGAC	11	90821	['N1', 'N2', 'N3']		5	6	1097	59	42	221	120	292
RyhB	shiA			3	1	1	1	['3', '4', '5']	TACTGGGAGCA	11	2054268	['N1', 'N2', 'N3']		0	0	723	6	0	0	73	14
RyhB	sodB			3	1	0	0	['3', '4', '5']	CTCTGGCACCG	11	1735418	['N1', 'N2', 'N3']	down	0	6	1085	0	40	197	0	289
RyhB	tyrS			3	1	1	1	['3', '4', '5']	TGCTGGAAATA	11	1715959	['N3', 'N1', 'N2']		5	6	1099	57	40	204	124	284
RyhB	ubiD			3	1	1	1	['3', '4', '5']	TTCTGGTAGAA	11	4026270	['N1', 'N2', 'N3']		6	6	1099	31	39	219	123	346
RyhB	waaO			3	1	1	1	['3', '4', '5']	TGCTGGCGGAT	11	3802379	['N1', 'N2', 'N3']		0	0	785	0	0	39	0	0
RyhB	waaU			3	1	1	1	['3', '4', '5']	TACTGAAGCAT	11	3798789	['N1', 'N2', 'N3']		0	0	94	0	0	0	0	0
RyhB	wbbH			3	1	1	1	['3', '4', '5']	TACTGAATACT	11	2106667	['N1', 'N2', 'N3']		0	0	55	0	0	0	0	0
RyhB	ydfG			1	1	0	0	['3', '4', '5']	TGCTGGCATCG	11	1627707	['N1', 'N2', 'N3']		1	3	1095	45	36	212	123	292
RyhB	ydiJ			3	1	0	0	['3', '4', '5']	AGCTGGAGCAA	11	1768624	['N1', 'N2', 'N3']		3	6	1099	38	34	206	124	339
RyhB	yfcE			3	1	1	1	['3', '4', '5']	TACTGGAAAAA	11	2419505	['N1', 'N2', 'N3']		2	6	1098	1	40	0	124	289
RyhB	yfdH			3	1	1	1	['3', '4', '5']	TGCTGGAGATA	11	2468810	['N2', 'N3', 'N1']		4	0	447	32	5	36	5	54
RyhB	ymdA			3	1	1	1	['3', '4', '5']	TGCTGGAAGCA	11	1105476	['N2', 'N3', 'N1']		0	0	414	0	0	0	0	0
RyhB	yncE	U		3	1	0	0	['3', '4', '5']	TGCTGGATGAT	11	1523689	['N1', 'N2', 'N3']	up	0	0	1088	6	0	0	0	208
RyhB	yqiB			3	0	1	0	['3', '4', '5']	GACTGGTTGCG	11	3176911	['N3', 'N1', 'N2']		3	4	1099	53	10	0	125	368
RyhB	zapB			3	1	0	0	['3', '4', '5']	AACTGGAAGCA	11	4118543	['N1', 'N2', 'N3']		2	0	1098	34	38	168	123	330
SdhX	ackA		2	3	1	1	0	['4', '5']	CTATGCCGGAA	11	2413936	['N2', 'N3']		0	0	449	0	0	0	0	0
SdhX	fdnG		1		1	1	0	['4', '5']	CGATGACCAAC	11	1548035	['N2', 'N3']		0	0	453	0	0	0	0	0
SdhX	lpxA	2	2	3	1	1	1	['4', '5']	CCATGTCGAAA	11	202661	['N3', 'N1']		0	0	449	0	0	0	0	0
SdhX	rpsJ		1	2	1	0	0	['4', '5']	CGCTGCCGACA	11	3453149	['N2', 'N3']		0	0	449	0	0	0	0	0
SdhX	ydiJ	U	3	2	1	1	1	['4', '5']	CAATGTCGACC	11	1768567	['N2', 'N3']		0	0	449	0	0	0	0	0
SdhX	yehS	U	3	2	1	1	1	['4', '5']	TAATGTCGAAG	11	2212113	['N3', 'N1']		0	0	449	0	0	0	0	0
SdhX	yjdM	3	3	2	1	1	1	['4', '5']	CACTGCCCAAA	11	4326722	['N1', 'N2']		0	0	449	0	0	0	0	0
SpF	fabR	3	1	3	1	0	0	['1', '2', '7']	AAGGGGCT	8	4161698	['N2', 'N3', 'N2']		2	6	1097	44	37	198	125	360
SpF	glpF	3	2	3	1	1	1	['1', '2', '7']	AAGTCGCT	8	4117993	['N2', 'N3', 'N2']		6	6	1102	33	39	212	124	289
SpF	lpd	1	U	1	1	1	1	['1', '2', '7']	AAAGCACT	8	128071	['N1', 'N2', 'N1']		2	6	1095	40	42	212	124	345
SpF	sthA	U	U	1	1	0	0	['1', '2', '7']	AAGGCGCT	8	4160735	['N2', 'N3', 'N2']		2	0	1097	48	39	216	119	338
SpF	tnaB	6	3	3	1	1	1	['1', '2', '7']	AAAGCACT	8	3890256	['N3', 'N1', 'N3']		0	0	424	3	24	0	0	0
UhpU	fliA	U		3	1	1	1	['6']	ATTACCAG	8	2001191	['N1']		0	0	856	0	0	0	0	0
UhpU	fliC	6		3	1	1	1	['6']	ACTACCGG	8	2003309	['N3']		0	0	52	0	0	0	0	0
UhpU	glpT	4		1	1	1	1	['6']	ATCGCCAT	8	2351603	['N3']		0	0	1069	0	0	0	0	0
UhpU	gnsB	6	2	3	1	1	1	['6']	GTTACCAG	8	1637686	['N3']		0	0	424	0	0	0	0	0
UhpU	malK	5		2	1	1	1	['6']	GTTGCCAT	8	4247835	['N1']		0	0	1091	0	0	0	0	0
UhpU	nagE	1		3	1	1	1	['6']	ATTACCGG	8	704250	['N3']		0	0	1071	0	0	0	0	0
UhpU	nanT	4		3	1	1	1	['6']	GTCACCAG	8	3372310	['N3']		0	0	862	0	0	0	0	0
UhpU	ompC			3	1	1	1	['6']	TTTACCAG	8	2311659	['N1']		0	0	1082	0	0	0	0	0
UhpU	tdcB	6		2	1	1	1	['6']	ATCACCGG	8	3265062	['N3']		0	0	1054	0	0	0	0	0
UhpU	tnaA	5	U	3	1	1	1	['6']	ATCACCAG	8	3889312	['N3']		0	0	443	0	0	0	0	0
UhpU	uspD	U			1	0	0	['6']	GATGCCGG	8	4113649	['N2']		0	0	416	0	0	0	0	0
UhpU	yfaY	3		3	1	1	1	['6']	GTCACCAT	8	2363483	['N3']		0	0	1072	0	0	0	0	0
UhpU	ysaA	4		1	1	1	1	['6']	GTCACCAG	8	3741478	['N2']		0	0	1074	0	0	0	0	0

## Sheet: Legend
A: sRNA – Name of sRNA
B: Target – Target gene name
C-E: Log, stationary, iron library – was the interaction detected in any of these condition in at least three libraries in the RIL-seq experiment (Melamed et al. 2016). Number of libraries the interaction was detected in is indicated. “U” signifies that the interaction was statistically significant in a unified database including all libraries of a tested condition. In parenthesis (e.g., “out of …
F-H: EPEC, Klebsiella, Salmonella – Was the interaction detected in these organisms by RIL-seq (Pearl et al. 2021; Matera et al. 2022; Goh et al. 2024). Detected:1. Not detected:0.
I: Prime positions in motif – Positions are counted from the beginning of the motif on the target sequence.
J: Motif sequence – Sequence of the motif in the target gene.
K: Length of binding site - Length of the binding motif
L: Start motif position – Genomic coordinate of the start position of the motif on the target.
M: Location of prime positions in regard to the reading frame – Is the prime position aligned with the first position of a codon (N1), second position of a codon (N2), third position of a codon (N3)?
N : Effect of sRNA on target expression – Was the target gene upregulated or downregulated under overexpression of the sRNA (Faigenbaum-Romm et al. 2020).
O-V: The numbers of genomes in Enterobacterales families the target was conserved in.
Referencs
Faigenbaum-Romm, R., A. Reich, Y. E. Gatt, M. Barsheshet, L. Argaman, and H. Margalit. 2020. 'Hierarchy in Hfq Chaperon Occupancy of Small RNA Targets Plays a Major Role in Their Regulation', Cell Rep, 30: 3127-38 e6.
Goh, K. J., Y. Altuvia, L. Argaman, Y. Raz, A. Bar, T. Lithgow, H. Margalit, and Y. H. Gan. 2024. 'RIL-seq reveals extensive involvement of small RNAs in virulence and capsule regulation in hypervirulent Klebsiella pneumoniae', Nucleic Acids Res, 52: 9119-38.
Matera, G., Y. Altuvia, M. Gerovac, Y. El Mouali, H. Margalit, and J. Vogel. 2022. 'Global RNA interactome of Salmonella discovers a 5' UTR sponge for the MicF small RNA that connects membrane permeability to transport capacity', Mol Cell, 82: 629-44 e4.
Melamed, S., A. Peer, R. Faigenbaum-Romm, Y. E. Gatt, N. Reiss, A. Bar, Y. Altuvia, L. Argaman, and H. Margalit. 2016. 'Global Mapping of Small RNA-Target Interactions in Bacteria', Mol Cell, 63: 884-97.
Pearl Mizrahi, S., N. Elbaz, L. Argaman, Y. Altuvia, N. Katsowich, Y. Socol, A. Bar, I. Rosenshine, and H. Margalit. 2021. 'The impact of Hfq-mediated sRNA-mRNA interactome on the virulence of enteropathogenic Escherichia coli', Sci Adv, 7: eabi8228.
