# Supplementary material
Source: HighWire-hosted journal article supplement (doi:10.1101/rna.080839.125)
Supplement: SupplementalTableS2.xlsx [file SupplementalTableS2.xlsx]

## Sheet: Supplementary Table S2 (1)
Table S2:	Associated codons and amino acids of prime positions aligned with N3
Codon	Amino acid	Number of codons PPC3	Fraction PP AAD3	Is codon most frequent?	Fraction E.coli	Number of codons E.coli	sRNAs interacting with the targets showing the prime positions assocaited with indicated codons
							ArcZ	CpxQ	CyaR	DsrA	FliX	GadF	MgrR	MicA	RprA	RyhB	SdhX	Spf	UhpU
AAA	K	3	1	TRUE	0.74	129137												3
AAC	N	0	0	TRUE	0.51	78443
AAG	K	0	0	FALSE	0.26	45459
AAU	N	1	1	FALSE	0.49	75436											1
ACA	T	0	0	FALSE	0.17	33910
ACC	T	27	0.82	TRUE	0.4	80547	20												7
ACG	T	1	0.03	FALSE	0.25	50269			1
ACU	T	5	0.15	FALSE	0.19	37842		1								4
AGA	R	0	0	FALSE	0.07	13152
AGC	S	3	0.33	TRUE	0.25	55551									3
AGG	R	0	0	FALSE	0.04	7607
AGU	S	0	0	FALSE	0.16	36097
AUA	I	0	0	FALSE	0.11	24984
AUC	I	0	0	FALSE	0.39	86796
AUG	M	26	1	TRUE	1	96695		10	6				7				3
AUU	I	0	0	TRUE	0.49	109072
CAA	Q	0	0	FALSE	0.34	53394
CAC	H	1	0.5	FALSE	0.43	34078												1
CAG	Q	53	1	TRUE	0.66	104171	45		7			1
CAU	H	1	0.5	TRUE	0.57	45879											1
CCA	P	0	0	FALSE	0.2	31534
CCC	P	0	0	FALSE	0.13	19666
CCG	P	3	1	TRUE	0.49	76644	1		2
CCU	P	0	0	FALSE	0.18	27340
CGA	R	0	0	FALSE	0.07	13844
CGC	R	5	0.56	TRUE	0.36	72212								4	1
CGG	R	4	0.44	FALSE	0.11	21552	2		2
CGU	R	0	0	TRUE	0.36	73197
CUA	L	0	0	FALSE	0.04	15409
CUC	L	0	0	FALSE	0.1	37347
CUG	L	94	0.96	TRUE	0.47	177210	4	17	28			4				40	1
CUU	L	0	0	FALSE	0.12	43449
GAA	E	1	0.5	TRUE	0.68	143353												1
GAC	D	2	0.67	FALSE	0.37	70394										2
GAG	E	1	0.5	FALSE	0.32	68609			1	;
GAU	D	1	0.33	TRUE	0.63	119939		1
GCA	A	7	0.29	FALSE	0.23	77547							7
GCC	A	5	0.21	FALSE	0.26	88721	4												1
GCG	A	2	0.08	TRUE	0.33	110308			1	1
GCU	A	10	0.42	FALSE	0.18	62479		2			4					4
GGA	G	0	0	FALSE	0.13	34799
GGC	G	2	1	TRUE	0.37	99390								1	1
GGG	G	0	0	FALSE	0.15	41277
GGU	G	0	0	FALSE	0.35	93325
GUA	V	0	0	FALSE	0.17	42420
GUC	V	2	0.2	FALSE	0.2	52439	2
GUG	V	5	0.5	TRUE	0.35	89265			4			1
GUU	V	3	0.3	FALSE	0.28	72584		3
UAA	*	0	0	TRUE	0.61	7356
UAC	Y	6	0.86	FALSE	0.41	44631									3	3
UAG	*	0	0	FALSE	0.09	989
UAU	Y	1	0.14	TRUE	0.59	63937		1
UCA	S	0	0	TRUE	0.14	32715
UCC	S	2	0.22	FALSE	0.15	33430	2
UCG	S	2	0.22	FALSE	0.14	31146			2
UCU	S	2	0.22	FALSE	0.17	38027		2
UGA	*	0	0	FALSE	0.3	3623
UGC	C	2	1	TRUE	0.54	22188								1		1
UGG	W	7	1	TRUE	1	50991							7
UGU	C	0	0	FALSE	0.46	19138
UUA	L	0	0	FALSE	0.14	52382
UUC	F	1	0.5	FALSE	0.42	58774										1
UUG	L	4	0.04	FALSE	0.13	47500		2	2
UUU	F	1	0.5	TRUE	0.58	80995		1
Table S2 headers
Codon - Three-nucleotide sequence (triplet) encoding a specific amino acid.
Amino acid - The amino acid specified by the codon (one-letter amino acid code).
Number of codons PPC3 - Number of prime positions aligned with position 3 of the codon (hereinafter, PPC3 dataset).
Fraction PP AAD3 - Relative fraction of each codon among all codons coding for the same amino acid based on the PPC3 dataset). Values range between 0 and 1.
Is codon most frequent? - Indicates whether the codon is the most frequently used codon for that amino acid in E.coli (TRUE/FALSE).
Fraction E.coli - Frequency of the codon out of the total of cognate codons in all E. coli coding sequences.
Number of codons E.coli - Total number of occurrences of the codon in E. coli protein-coding genes.
sRNAs interacting with the targets showing the prime positions assocaited with indicated codons - Each column corresponds to one small RNA (sRNA). The numeric value indicates the number of targets that their prime positions coincided with position 3 of this codon in the binding site of the respective sRNA.
