# Supplementary material
Source: HighWire-hosted journal article supplement (doi:10.1101/rna.080839.125)
Supplement: SupplementalTableS3.xlsx [file SupplementalTableS3.xlsx]

## Sheet: גיליון1
Table S3: Comparison of reading frame adjustment of prime positions between affected and unaffected targets
A. sRNAs with more than one prime position
	Targets not affected by the sRNA in their expression level		Targets affected by the sRNA in their expression level
	# Prime positions not adjusted with the reading frame	# Prime positions adjusted with the reading frame	# Prime positions not adjusted with the reading frame	# Prime positions adjusted with the reading frame
ArcZ	33	46(44)*	2	6(6)*
RyhB	11	33(33)*	4	7(7)*
B. sRNA with one prime position
	Targets not affected by the sRNA in their expression level			Targets affected by the sRNA in their expression level
	# Prime positions adjusted with N1	# Prime positions adjusted with N2	# Prime positions adjusted with N3	# Prime positions adjusted with N1	# Prime positions adjusted with N2	# Prime positions adjusted with N3
CyaR	30	8	52(46)*	4	0	4(2)*
* Number of Prime positions that coincide with the most frequent codon
