# Supplementary material
Source: HighWire-hosted journal article supplement (doi:10.1101/rna.080839.125)
Supplement: SupplementalTableS4.xlsx [file SupplementalTableS4.xlsx]

## Sheet: גיליון1
Table S4: Conservation of sRNAs derived from the 3′UTR of protein-coding genes and of their host genes
	1118	149	124	349	37	238	6	6
Gene	Entrobac.	Erwinia.	Pectobac.	Yersinia.	Hafnia.	Morgane.	Bruguieri.	Budvicia.
AceK	1097	13	116	235	14	47	1	-
cpxP	1095	24	121	280	16	-	2	-
gadE	1092	-	-	-	-	-	-	-
fliC	1091	-	-	-	-	-	-	-
sucD	1088	38	124	306	37	206	6	6
uhpT	1082	-	51	-	-	8	-	-
sRNA
AceK-int	1092	11	58	142	16	52	-	-
CpxQ	1099	93	124	345	37	236	5	6
GadF	414	-	-	1	-	-	-	-
FliX	774	-	-	-	-	-	-	-
SdhX	448	-	-	-	-	-	-	-
UhpU	1071	3	51	-	-	1	-	-
