# Supplementary material
Source: HighWire-hosted journal article supplement (doi:10.1101/rna.080839.125)
Supplement: SupplementalTableS5.xlsx [file SupplementalTableS5.xlsx]

## Sheet: גיליון1
Table S5: Correspondence of nucleotides at prime positions with the frequent codons in different genomes
sRNA	Nuleotide in third position of frequent codon	Nucleotide in prime position coinciding with the third codon position (# of genomes)
		G	A	C	U
RyhB	G is the third nucleotide position of most frequent codon	559	0	0	0
RyhB	A is the third nucleotide position of most frequent codon	36	128	0	1
ArcZ	G is the third nucleotide position of most frequent codon	205	1	0	0
ArcZ	A is the third nucleotide position of most frequent codon	5	22	0	0
CyaR	G is the third nucleotide position of most frequent codon	52	0	0	0
CyaR	A is the third nucleotide position of most frequent codon	0	101	0	0
CpxQ	G is the third nucleotide position of most frequent codon	590	0	0	6
CpxQ	A is the third nucleotide position of most frequent codon	14	137	1	19
