# Supplementary material
Source: HighWire-hosted journal article supplement (doi:10.1101/rna.080839.125)
Supplement: SupplementalTableS6.xlsx [file SupplementalTableS6.xlsx]

## Sheet: Average number of fulfilled bas
Table S6: Average number of fulfilled base pairs per binding site across all targets over all organisms (except for Enterobacteriaceae)
sRNA	Average number of conserved base pairs
ArcZ	8.51807
CpxQ	7.2619
CyaR	6.06452
GcvB	7.6
MgrR	7.42857
MicA	7.83333
RprA	6.21053
RyhB	6.47059
SpF	4.6

## Sheet: Enterobacteriaceae average numb
Average number of fulfilled base pairs per binding site across all targets targets over all organismsin the Enterobacteriaceae family
sRNA	Average number of conserved base pairs
ArcZ	9.02353
CpxQ	8.47727
CyaR	7.53061
DsrA	7.66667
FliX	7
GadF	6.85714
GcvB	8.47059
MgrR	7
MicA	9.15385
RprA	7.15789
RyhB	7.41818
SdhX	8.57143
SpF	5
UhpU	6.23077

## Sheet: Number of fulfilled base pairs
Table 2: Number of fulfilled base pairs per binding site in target over all organisms (except for Enterobacteriaceae)
sRNA	Target	Number of conserved base pairs
ArcZ	flxA	6
ArcZ	kdsC	8
ArcZ	cstA	9
ArcZ	ompA	6
ArcZ	dctR	11
ArcZ	glpT	10
ArcZ	oppA	9
ArcZ	mglA	8
ArcZ	ompT	10
ArcZ	malG	8
ArcZ	lptB	10
ArcZ	hypE	7
ArcZ	sucD	8
ArcZ	fliF	7
ArcZ	aegA	6
ArcZ	gyrA	9
ArcZ	crp	9
ArcZ	pgi	9
ArcZ	tar	12
ArcZ	uup	9
ArcZ	yaeP	10
ArcZ	plsB	10
ArcZ	nuoM	9
ArcZ	secB	9
ArcZ	ligA	11
ArcZ	sfsA	9
ArcZ	glpK	11
ArcZ	ydcI	8
ArcZ	pykA	5
ArcZ	ygiM	8
ArcZ	nudF	7
ArcZ	ibpA	9
ArcZ	yfgD	5
ArcZ	uspA	8
ArcZ	yegT	9
ArcZ	pepP	9
ArcZ	yjgA	7
ArcZ	bamE	9
ArcZ	clpP	10
ArcZ	yddB	11
ArcZ	rlmI	10
ArcZ	fiu	8
ArcZ	ompF	7
ArcZ	yeaC	7
ArcZ	diaA	9
ArcZ	nrdE	6
ArcZ	ycaC	11
ArcZ	gnsB	11
ArcZ	rhlB	8
ArcZ	ybeD	8
ArcZ	prlC	9
ArcZ	sthA	7
ArcZ	yagE	11
ArcZ	tdcE	9
ArcZ	gltP	4
ArcZ	rbsD	12
ArcZ	hrpA	11
ArcZ	folA	7
ArcZ	yphC	8
ArcZ	osmY	10
ArcZ	yfbV	7
ArcZ	lpxC	11
ArcZ	valS	8
ArcZ	secD	9
ArcZ	yqeC	11
ArcZ	gpmA	9
ArcZ	yciT	8
ArcZ	aspA	9
ArcZ	napF	7
ArcZ	ompC	12
ArcZ	lptF	6
ArcZ	gcvT	9
ArcZ	rpoB	7
ArcZ	emrA	7
ArcZ	clpS	10
ArcZ	mglC	7
ArcZ	cspD	7
ArcZ	yfaY	6
ArcZ	metN	6
ArcZ	rsgA	9
ArcZ	ycbJ	6
ArcZ	rsmA	9
ArcZ	hemX	9
ChiX	yfeH	4
ChiX	nadE	5
ChiX	chiP	3
CpxQ	ypfJ	10
CpxQ	nadR	6
CpxQ	clpS	5
CpxQ	araJ	10
CpxQ	glpK	9
CpxQ	alaS	5
CpxQ	htpX	7
CpxQ	glpT	5
CpxQ	secM	8
CpxQ	ompF	8
CpxQ	proP	9
CpxQ	kgtP	8
CpxQ	yhaV	7
CpxQ	yqeB	6
CpxQ	yfhM	7
CpxQ	shiA	8
CpxQ	flgE	3
CpxQ	rmf	9
CpxQ	rfbC	5
CpxQ	ivy	10
CpxQ	ybgE	5
CpxQ	yhcO	5
CpxQ	ddlA	11
CpxQ	emrA	8
CpxQ	tehA	7
CpxQ	yfdY	13
CpxQ	gatB	8
CpxQ	hupA	8
CpxQ	ytfP	6
CpxQ	yifK	2
CpxQ	bamA	9
CpxQ	fes	5
CpxQ	hupB	6
CpxQ	ampH	5
CpxQ	lpp	8
CpxQ	mscL	6
CpxQ	panD	7
CpxQ	uspE	9
CpxQ	tolB	9
CpxQ	truA	8
CpxQ	oppA	7
CpxQ	uspA	8
CyaR	mscL	6
CyaR	eda	6
CyaR	dcuA	4
CyaR	recA	7
CyaR	yejO	9
CyaR	ampE	4
CyaR	clpS	1
CyaR	mdh	2
CyaR	ftsZ	5
CyaR	mraY	8
CyaR	atpI	4
CyaR	uspE	4
CyaR	amtB	6
CyaR	clpB	7
CyaR	uspB	6
CyaR	ptsG	8
CyaR	gltX	6
CyaR	fieF	8
CyaR	cyoB	5
CyaR	adhE	4
CyaR	yohD	11
CyaR	rhtA	3
CyaR	rpsK	5
CyaR	ftsK	11
CyaR	slyB	5
CyaR	alsE	7
CyaR	gapA	2
CyaR	yjjU	7
CyaR	yidI	11
CyaR	dctA	5
CyaR	yajC	4
CyaR	ybaL	6
CyaR	ydcH	8
CyaR	rpsT	2
CyaR	ubiC	4
CyaR	trkG	4
CyaR	smpB	5
CyaR	crcB	9
CyaR	rfbA	4
CyaR	nuoL	5
CyaR	hdeD	9
CyaR	murG	4
CyaR	nlpD	11
CyaR	znuC	7
CyaR	zapB	5
CyaR	hflX	5
CyaR	yeiH	2
CyaR	yjdC	6
CyaR	yeaQ	7
CyaR	ychJ	11
CyaR	sbmA	9
CyaR	ompX	7
CyaR	lysP	6
CyaR	fliC	9
CyaR	yfdY	10
CyaR	ecnB	12
CyaR	rbsC	4
CyaR	yacL	2
CyaR	pitA	5
CyaR	fabG	6
CyaR	cbpM	7
CyaR	cstA	9
CyaR	pfkA	6
CyaR	ansB	3
CyaR	glpT	5
CyaR	dusC	4
CyaR	flgG	6
CyaR	yecH	7
CyaR	helD	6
CyaR	mdtK	3
CyaR	yicL	8
CyaR	gntU	6
CyaR	ybeD	2
CyaR	aqpZ	5
CyaR	ompA	4
CyaR	cydB	4
CyaR	rppH	5
CyaR	dcuC	5
CyaR	dtpB	5
CyaR	nanT	5
CyaR	kgtP	6
CyaR	glpD	7
CyaR	ftsE	6
CyaR	rimP	4
CyaR	dpiB	12
CyaR	nrfD	7
CyaR	ybfA	9
CyaR	ftsY	6
CyaR	tdcA	10
CyaR	gpmA	5
CyaR	nhaA	5
CyaR	pgpB	8
CyaR	glf	9
DsrA	guaA	10
DsrA	hns	6
DsrA	nlpD	11
DsrA	rpoS	9
DsrA	yfgM	10
DsrA	rbsD	11
FliX	rplC	8
FliX	fliC	8
FliX	rpsQ	7
FliX	rpsS	10
FliX	mglB	10
FnrS	iscR	8
GadF	yohP	8
GadF	wrbA	6
GadF	elaB	5
GadF	trmJ	8
GadF	lpp	6
GadF	yebO	7
GadF	fabZ	8
GcvB	asnA	9
GcvB	yhjE	7
GcvB	oppA	11
GcvB	rppH	7
GcvB	ysgA	10
GcvB	rodZ	4
GcvB	ybhP	3
GcvB	thrL	8
GcvB	ilvM	8
GcvB	malE	9
GcvB	glpC	6
GcvB	icd	7
GcvB	rpsT	7
GcvB	nlpA	8
GcvB	trpE	10
MgrR	ycbZ	6
MgrR	amn	7
MgrR	aspA	8
MgrR	ygdQ	8
MgrR	zapB	7
MgrR	gloB	7
MgrR	dacC	8
MgrR	cheA	8
MgrR	soxS	8
MgrR	napH	8
MgrR	motB	7
MgrR	minD	7
MgrR	ygfZ	8
MgrR	dctA	7
MicA	hisJ	7
MicA	cysB	9
MicA	ompC	8
MicA	tolB	12
MicA	htpX	8
MicA	pykA	4
MicA	ompA	7
MicA	rbsC	8
MicA	moaA	6
MicA	ompF	9
MicA	sucA	9
MicA	clpB	7
OmrB	iscS	7
OmrB	fecA	4
OmrB	fabA	6
RprA	evgA	9
RprA	leuS	6
RprA	rpoE	7
RprA	pspB	6
RprA	ompF	5
RprA	katG	6
RprA	gltI	8
RprA	mltD	6
RprA	yfgM	4
RprA	rcsB	6
RprA	gltB	6
RprA	fur	6
RprA	nlpD	3
RprA	focA	6
RprA	rlmE	7
RprA	bax	7
RprA	lpd	6
RprA	flhD	6
RprA	fabZ	8
RybB	ftsI	8
RydC	yrbL	8
RyhB	exbB	3
RyhB	chbB	6
RyhB	cysE	4
RyhB	rraB	7
RyhB	katG	0
RyhB	infB	4
RyhB	metH	6
RyhB	mrp	5
RyhB	gcvH	8
RyhB	yncE	10
RyhB	fliA	8
RyhB	fliF	6
RyhB	ymdA	11
RyhB	yfcE	4
RyhB	waaU	7
RyhB	flgA	7
RyhB	ubiD	4
RyhB	shiA	3
RyhB	paaJ	5
RyhB	motB	1
RyhB	ligB	10
RyhB	gatZ	8
RyhB	tyrS	8
RyhB	rpsO	7
RyhB	nirB	8
RyhB	cysJ	9
RyhB	nuoC	5
RyhB	proP	5
RyhB	nuoA	6
RyhB	fdoG	9
RyhB	yqiB	6
RyhB	accA	9
RyhB	ydiJ	5
RyhB	rplU	6
RyhB	gpmM	6
RyhB	ribF	8
RyhB	sodB	6
RyhB	fabZ	8
RyhB	lpp	7
RyhB	narG	8
RyhB	chiP	9
RyhB	dksA	8
RyhB	hns	8
RyhB	fdx	6
RyhB	cirA	4
RyhB	rsmH	6
RyhB	zapB	9
RyhB	ispA	9
RyhB	ydfG	2
RyhB	rplL	8
RyhB	hybO	8
SpF	sthA	5
SpF	fabR	5
SpF	glpF	3
SpF	lpd	6
SpF	tnaB	4
UhpU	uspD	7
UhpU	ompC	7
UhpU	fliA	7
UhpU	fliC	6
UhpU	gnsB	8
UhpU	malK	7
UhpU	nagE	7
UhpU	nanT	8
UhpU	tdcB	7
UhpU	tnaA	7
UhpU	yfaY	7
UhpU	ysaA	8
UhpU	glpT	6

## Sheet: Enterobacteriaceae Number of fu
Table S6: Number of fulfilled base pairs per binding site in target over all organisms in the Enterobacteriaceae family
sRNA	Target	countY
ArcZ	flxA	10
ArcZ	kdsC	10
ArcZ	cstA	10
ArcZ	ompA	6
ArcZ	rcnB	7
ArcZ	dctR	11
ArcZ	glpT	11
ArcZ	oppA	10
ArcZ	mglA	6
ArcZ	ompT	9
ArcZ	malG	9
ArcZ	lptB	11
ArcZ	hypE	8
ArcZ	sucD	8
ArcZ	fliF	9
ArcZ	aegA	6
ArcZ	gyrA	9
ArcZ	crp	10
ArcZ	pgi	9
ArcZ	tar	8
ArcZ	uup	9
ArcZ	yaeP	10
ArcZ	plsB	9
ArcZ	nuoM	10
ArcZ	secB	9
ArcZ	ligA	11
ArcZ	sfsA	10
ArcZ	glpK	9
ArcZ	ydcI	8
ArcZ	pykA	7
ArcZ	ygiM	7
ArcZ	nudF	9
ArcZ	ibpA	10
ArcZ	yfgD	7
ArcZ	uspA	8
ArcZ	yegT	12
ArcZ	pepP	8
ArcZ	yjgA	9
ArcZ	bamE	10
ArcZ	clpP	10
ArcZ	yddB	11
ArcZ	rlmI	12
ArcZ	fiu	10
ArcZ	ompF	8
ArcZ	yeaC	7
ArcZ	diaA	8
ArcZ	nrdE	5
ArcZ	ycaC	11
ArcZ	gnsB	10
ArcZ	rhlB	8
ArcZ	ybeD	9
ArcZ	prlC	10
ArcZ	sthA	8
ArcZ	yagE	12
ArcZ	tdcE	9
ArcZ	gltP	7
ArcZ	rbsD	13
ArcZ	hrpA	10
ArcZ	folA	8
ArcZ	yphC	9
ArcZ	osmY	10
ArcZ	yfbV	9
ArcZ	lpxC	11
ArcZ	valS	7
ArcZ	secD	9
ArcZ	yqeC	11
ArcZ	gpmA	9
ArcZ	yciT	6
ArcZ	preT	7
ArcZ	aspA	13
ArcZ	napF	9
ArcZ	ompC	12
ArcZ	lptF	6
ArcZ	gcvT	8
ArcZ	rpoB	8
ArcZ	emrA	10
ArcZ	clpS	10
ArcZ	mglC	8
ArcZ	cspD	9
ArcZ	yfaY	7
ArcZ	metN	8
ArcZ	rsgA	9
ArcZ	ycbJ	9
ArcZ	rsmA	9
ArcZ	hemX	9
ChiX	yfeH	5
ChiX	nadE	5
ChiX	chiP	4
CpxQ	ypfJ	10
CpxQ	nadR	9
CpxQ	clpS	10
CpxQ	waaS	6
CpxQ	araJ	9
CpxQ	glpK	9
CpxQ	alaS	8
CpxQ	htpX	8
CpxQ	glpT	8
CpxQ	alaE	8
CpxQ	secM	8
CpxQ	ompF	10
CpxQ	proP	10
CpxQ	kgtP	7
CpxQ	yhaV	10
CpxQ	yqeB	9
CpxQ	yfhM	10
CpxQ	shiA	6
CpxQ	flgE	5
CpxQ	rmf	9
CpxQ	rfbC	7
CpxQ	ivy	9
CpxQ	ybgE	5
CpxQ	yhcO	5
CpxQ	ddlA	11
CpxQ	emrA	10
CpxQ	tehA	6
CpxQ	yfdY	12
CpxQ	gatB	10
CpxQ	hupA	11
CpxQ	ytfP	6
CpxQ	yifK	7
CpxQ	bamA	12
CpxQ	fes	10
CpxQ	hupB	7
CpxQ	ampH	7
CpxQ	lpp	8
CpxQ	mscL	10
CpxQ	panD	8
CpxQ	uspE	10
CpxQ	tolB	11
CpxQ	truA	8
CpxQ	oppA	6
CpxQ	uspA	8
CyaR	mscL	7
CyaR	eda	8
CyaR	dcuA	4
CyaR	recA	12
CyaR	yejO	9
CyaR	ampE	4
CyaR	clpS	6
CyaR	mdh	7
CyaR	ftsZ	7
CyaR	mraY	9
CyaR	atpI	7
CyaR	uspE	6
CyaR	amtB	7
CyaR	clpB	9
CyaR	uspB	7
CyaR	ptsG	7
CyaR	gltX	7
CyaR	fieF	7
CyaR	tamA	5
CyaR	cyoB	10
CyaR	adhE	9
CyaR	yohD	7
CyaR	rhtA	6
CyaR	rpsK	7
CyaR	ftsK	6
CyaR	slyB	7
CyaR	alsE	10
CyaR	gapA	7
CyaR	yjjU	5
CyaR	yidI	11
CyaR	dctA	7
CyaR	yajC	11
CyaR	ybaL	10
CyaR	ydcH	10
CyaR	rpsT	8
CyaR	wbbH	8
CyaR	ubiC	6
CyaR	trkG	6
CyaR	tcdA	8
CyaR	smpB	8
CyaR	crcB	7
CyaR	rfbA	5
CyaR	nuoL	8
CyaR	hdeD	9
CyaR	murG	10
CyaR	nlpD	9
CyaR	znuC	10
CyaR	zapB	12
CyaR	hflX	8
CyaR	yeiH	5
CyaR	yjdC	8
CyaR	yeaQ	7
CyaR	ychJ	7
CyaR	sbmA	6
CyaR	ompX	8
CyaR	lysP	7
CyaR	fliC	9
CyaR	yfdY	4
CyaR	patD	7
CyaR	ecnB	10
CyaR	rbsC	10
CyaR	yacL	6
CyaR	pitA	5
CyaR	fabG	7
CyaR	cbpM	5
CyaR	cstA	8
CyaR	pfkA	8
CyaR	ansB	7
CyaR	glpT	10
CyaR	dusC	5
CyaR	flgG	8
CyaR	yecH	6
CyaR	helD	6
CyaR	mdtK	7
CyaR	yicL	7
CyaR	gntU	9
CyaR	ybeD	9
CyaR	aqpZ	7
CyaR	ompA	7
CyaR	cydB	5
CyaR	rppH	8
CyaR	dcuC	7
CyaR	dtpB	5
CyaR	nanT	9
CyaR	kgtP	4
CyaR	glpD	9
CyaR	ftsE	10
CyaR	rimP	9
CyaR	dpiB	9
CyaR	nrfD	7
CyaR	ybfA	9
CyaR	ftsY	7
CyaR	tdcA	7
CyaR	gpmA	8
CyaR	nhaA	3
CyaR	pgpB	6
CyaR	glf	9
CyaR	opgE	12
DsrA	guaA	7
DsrA	hns	5
DsrA	nlpD	11
DsrA	rpoS	4
DsrA	yfgM	9
DsrA	rbsD	10
FliX	rplC	6
FliX	fliC	8
FliX	rpsQ	5
FliX	rpsS	8
FliX	mglB	8
FnrS	iscR	9
GadF	yohP	8
GadF	wrbA	6
GadF	elaB	5
GadF	trmJ	8
GadF	lpp	6
GadF	yebO	7
GadF	fabZ	8
GcvB	asnA	9
GcvB	yhjE	10
GcvB	oppA	9
GcvB	rppH	8
GcvB	ysgA	8
GcvB	rodZ	2
GcvB	ybhP	8
GcvB	thrL	8
GcvB	ilvM	10
GcvB	malE	7
GcvB	glpC	7
GcvB	icd	9
GcvB	rpsT	9
GcvB	nlpA	12
GcvB	zapE	7
GcvB	trpE	10
GcvB	waaP	11
MgrR	ycbZ	6
MgrR	amn	6
MgrR	aspA	7
MgrR	ygdQ	8
MgrR	zapB	7
MgrR	gloB	7
MgrR	dacC	7
MgrR	cheA	8
MgrR	soxS	7
MgrR	napH	8
MgrR	motB	6
MgrR	minD	7
MgrR	ygfZ	7
MgrR	dctA	7
MicA	hisJ	8
MicA	cysB	10
MicA	ompC	8
MicA	tolB	12
MicA	ldtE	12
MicA	htpX	10
MicA	pykA	7
MicA	ompA	8
MicA	rbsC	9
MicA	moaA	8
MicA	ompF	10
MicA	sucA	10
MicA	clpB	7
OmrB	iscS	8
OmrB	fecA	6
OmrB	fabA	9
OmrB	rcnB	8
RprA	evgA	7
RprA	leuS	5
RprA	rpoE	9
RprA	pspB	7
RprA	ompF	6
RprA	katG	7
RprA	gltI	9
RprA	mltD	6
RprA	yfgM	9
RprA	rcsB	7
RprA	gltB	7
RprA	fur	6
RprA	nlpD	7
RprA	focA	7
RprA	rlmE	8
RprA	bax	6
RprA	lpd	8
RprA	flhD	7
RprA	fabZ	8
RydC	yrbL	7
RyhB	exbB	6
RyhB	chbB	7
RyhB	cysE	4
RyhB	rraB	8
RyhB	katG	5
RyhB	infB	6
RyhB	metH	7
RyhB	mrp	7
RyhB	gcvH	9
RyhB	yncE	7
RyhB	fliA	9
RyhB	fliF	8
RyhB	ymdA	9
RyhB	yfdH	6
RyhB	yfcE	4
RyhB	wbbH	7
RyhB	waaU	7
RyhB	waaO	4
RyhB	flgA	6
RyhB	ubiD	7
RyhB	shiA	6
RyhB	paaJ	6
RyhB	motB	7
RyhB	loiP	6
RyhB	ligB	9
RyhB	gatZ	9
RyhB	tyrS	10
RyhB	rpsO	8
RyhB	nirB	8
RyhB	cysJ	10
RyhB	nuoC	6
RyhB	proP	4
RyhB	nuoA	6
RyhB	fdoG	9
RyhB	yqiB	7
RyhB	accA	10
RyhB	ydiJ	8
RyhB	rplU	7
RyhB	gpmM	7
RyhB	ribF	9
RyhB	sodB	7
RyhB	fabZ	10
RyhB	lpp	7
RyhB	narG	9
RyhB	chiP	10
RyhB	dksA	9
RyhB	hns	9
RyhB	fdx	9
RyhB	cirA	6
RyhB	rsmH	8
RyhB	zapB	8
RyhB	ispA	10
RyhB	ydfG	4
RyhB	rplL	8
RyhB	hybO	9
SdhX	yehS	10
SdhX	ydiJ	8
SdhX	lpxA	11
SdhX	yjdM	7
SdhX	ackA	10
SdhX	rpsJ	7
SdhX	fdnG	7
SpF	sthA	5
SpF	fabR	5
SpF	glpF	4
SpF	lpd	6
SpF	tnaB	5
UhpU	uspD	7
UhpU	ompC	7
UhpU	fliA	7
UhpU	fliC	6
UhpU	gnsB	6
UhpU	malK	6
UhpU	nagE	7
UhpU	nanT	6
UhpU	tdcB	6
UhpU	tnaA	7
UhpU	yfaY	6
UhpU	ysaA	5
UhpU	glpT	5
